# Supplementary material for: Dicer Regulates Differentiation and Viability during Mouse Pancreatic Cancer Initiation
Source: PLoS One. 2014 May 1;9(5):e95486. doi: 10.1371/journal.pone.0095486 (PMC4006805; doi:10.1371/journal.pone.0095486)
Supplement: Table S3 — (XLS) [file pone.0095486.s009.xls]

## Sheet: Sheet1
Table S3 :RNASeq Data from sorted KrasDicerHet and KrasDicerHomo cells
gene name	average reads per position (Kras; DicerHet)	RPKM (Kras; DicerHet)	average reads per position (Kras; DicerHomo)	RPKM (Kras; DicerHomo)	foldchange (RPKM(Kras;DicerHomo+1)/(RPKMKras; DicerHet+1)	log2(fc)	P-value (Gusb)	P-value (Rpl23)
Serpini2	659.173	232.547	31.93	10.313	0.04844	-4.36766	8.763e-14	5.31e-11
Reg3a	6572.45	2318.66	452.461	146.141	0.063432	-3.97864	1.014e-15	6.33e-12
Reg3d	1289.68	454.982	87.984	28.418	0.064516	-3.95421	7.706e-14	9.575e-11
Sostdc1	79.408	28.014	3.141	1.015	0.069449	-3.8479	2.356e-05	8.933e-05
Reg3g	3991.34	1408.09	322.333	104.111	0.074595	-3.74478	4.032e-14	1.014e-10
Aqp12	131.684	46.456	8.848	2.858	0.081296	-3.62066	1.891e-06	2.625e-05
Cldn10	103.061	36.358	7.971	2.575	0.095696	-3.3854	3.675e-05	0.0002432
Klk1	3504.88	1236.47	373.158	120.527	0.098206	-3.34805	6.5e-12	5.377e-09
Pnliprp2	4447.27	1568.93	476.049	153.76	0.098577	-3.3426	4.975e-12	4.597e-09
Slc39a5	97.591	34.429	7.759	2.506	0.098958	-3.33703	4.522e-05	0.0002909
Tmed6	485.297	171.206	50.349	16.262	0.10024	-3.31846	2.286e-09	2.192e-07
AK160437	71.461	25.21	5.194	1.678	0.102175	-3.29089	0.0002591	0.0009695
Erp27	506.606	178.723	54.3	17.538	0.103148	-3.27722	3.872e-09	3.545e-07
AK019036	91.448	32.262	7.797	2.518	0.105766	-3.24105	9.311e-05	0.0006123
Tff2	1251.56	441.532	148.653	48.014	0.110758	-3.17452	2.91e-10	7.623e-08
Itih4	107.156	37.803	11.678	3.772	0.12298	-3.0235	5.972e-05	0.000377
Hsd17b13	154.577	54.533	18.327	5.919	0.124593	-3.00471	7.042e-06	8.328e-05
Slc25a35	36.226	12.78	2.31	0.746	0.126705	-2.98045	0.005015	0.01101
Spink3	3113.71	1098.47	431.957	139.519	0.127806	-2.96797	6.059e-10	1.823e-07
Derl3	169.77	59.892	21.148	6.831	0.128605	-2.95898	7.778e-06	9.242e-05
AK160158	76.594	27.021	8.439	2.726	0.132972	-2.91081	0.0004477	0.001633
Gatm	348.864	123.074	50.028	16.159	0.138297	-2.85416	3.209e-07	1.069e-05
Klk1b5	48.011	16.938	4.727	1.527	0.140874	-2.82752	0.004499	0.009464
Noxa1	35.311	12.457	2.796	0.903	0.141413	-2.82201	0.009295	0.01929
Bhlha15	121.662	42.921	16.478	5.322	0.14394	-2.79646	4.015e-05	0.0004668
Pycr1	58.003	20.463	6.646	2.147	0.146624	-2.7698	0.001226	0.004327
AK007854	72.914	25.723	9.279	2.997	0.149572	-2.74109	0.0005084	0.003036
Amy2b	604.736	213.342	96.613	31.205	0.150251	-2.73456	1.25e-07	6.979e-06
Rnase1	5882.17	2075.14	974.31	314.694	0.152058	-2.71731	6.209e-09	1.204e-06
Ptf1a	119.949	42.316	17.645	5.699	0.154654	-2.69288	0.0001323	0.0008015
Mir711	15.159	5.348	0	0	0.15753	-2.6663	0.05864	0.07309
Vtn	102.513	36.165	15.235	4.921	0.159317	-2.65003	0.0002305	0.001311
Pdia2	1161.85	409.882	201.623	65.123	0.160929	-2.6355	7.048e-08	5.853e-06
Pla2g1b	505.262	178.249	88.186	28.483	0.164481	-2.60401	5.385e-07	2.076e-05
Hamp2	17.506	6.176	0.572	0.185	0.165134	-2.59829	0.03026	0.06781
Amy1	128.351	45.28	20.67	6.676	0.16586	-2.59196	0.0001633	0.0009643
Pga5	19.101	6.739	0.88	0.284	0.165913	-2.5915	0.01623	0.03388
Copz2	118.727	41.885	18.991	6.134	0.166352	-2.58769	0.0001323	0.0008015
AK053418	83.369	29.411	12.599	4.069	0.166683	-2.58482	0.0006853	0.004206
Kirrel2	44.476	15.69	5.53	1.786	0.166926	-2.58272	0.005029	0.01632
Agr2	85.066	30.01	13.008	4.201	0.16772	-2.57587	0.0006656	0.00216
Ggh	357.048	125.961	63.109	20.384	0.16843	-2.56978	2.944e-06	7.848e-05
Fkbp11	246.997	87.137	43.12	13.927	0.169361	-2.56182	1.071e-05	0.0002224
Nfasc	41.023	14.472	5.134	1.658	0.171794	-2.54125	0.01632	0.03052
Try10	674.587	237.985	124.431	40.19	0.172354	-2.53655	4.995e-07	2.252e-05
Ctrl	6479.57	2285.9	1221.05	394.389	0.172893	-2.53205	4.502e-08	5.537e-06
Pnlip	1263.59	445.775	241.996	78.163	0.177188	-2.49665	2.311e-07	1.527e-05
Trpv6	43.266	15.264	5.857	1.892	0.177816	-2.49154	0.0087	0.01793
AK007376	15.86	5.595	0.577	0.186	0.179833	-2.47527	0.03026	0.06781
Cpn1	200.827	70.849	37.104	11.984	0.180712	-2.46823	3.358e-05	0.0005619
Slc6a9	84.209	29.708	14.364	4.639	0.183633	-2.4451	0.001091	0.005503
Cuzd1	1027.51	362.491	204.166	65.944	0.18417	-2.44089	5.666e-07	2.903e-05
Ero1lb	86.711	30.59	15.132	4.888	0.186388	-2.42362	0.0009649	0.005356
Gkn3	1318.8	465.254	266.72	86.148	0.186911	-2.41958	4.623e-07	2.653e-05
Aldh1l2	22.054	7.78	1.987	0.642	0.187016	-2.41877	0.06296	0.1265
Tsga10ip	22.992	8.111	2.203	0.712	0.187905	-2.41193	0.06296	0.1265
Fbln1	85.673	30.224	15.331	4.952	0.190623	-2.39121	0.001091	0.005503
Cabp2	105.991	37.392	19.592	6.328	0.190873	-2.38931	0.0005849	0.003189
Entpd1	43.645	15.397	6.616	2.137	0.191315	-2.38597	0.0087	0.01793
Cela1	5188.35	1830.38	1083.52	349.968	0.191642	-2.38352	2.429e-07	1.972e-05
Tspan1	128.449	45.315	24.53	7.923	0.192659	-2.37588	0.0004304	0.002205
Dmbt1	4949.02	1745.94	1047.11	338.208	0.194172	-2.36459	2.968e-07	2.29e-05
Cela3b	4410.38	1555.92	944.247	304.984	0.196532	-2.34716	3.756e-07	2.715e-05
Slc38a3	287.967	101.591	60.538	19.553	0.200339	-2.31948	4.825e-05	0.0004602
Nccrp1	29.937	10.561	4.098	1.324	0.201021	-2.31458	0.01846	0.03721
Gcat	185.59	65.473	39.574	12.782	0.207332	-2.26998	0.000195	0.001695
Procr	115.633	40.794	23.841	7.7	0.208164	-2.26421	0.000933	0.004625
P2rx1	90.394	31.89	18.124	5.854	0.208392	-2.26263	0.001438	0.006903
Lgals12	20.809	7.341	2.352	0.76	0.211006	-2.24464	0.1191	0.1232
Fgl2	29.31	10.34	4.375	1.413	0.212787	-2.23252	0.0186	0.03734
Ifitm1	22.525	7.946	2.803	0.905	0.212944	-2.23145	0.06296	0.1265
Rab26	24.421	8.615	3.273	1.057	0.213937	-2.22474	0.03362	0.06736
Egf	13.405	4.729	0.702	0.227	0.214174	-2.22315	0.05864	0.07309
Sepp1	2610.79	921.049	632.466	204.281	0.222636	-2.16724	2.818e-06	0.0001198
Gpt	48.999	17.286	9.82	3.172	0.228153	-2.13193	0.01294	0.02483
Rbpjl	346.861	122.368	84.648	27.341	0.229727	-2.12201	7.81e-05	0.0007654
1810009J06Rik	659.447	232.643	163.314	52.749	0.230048	-2.12	1.924e-05	0.0004008
Gp2	2308.97	814.57	578.685	186.911	0.230405	-2.11776	4.892e-06	0.0003094
Fgl1	71.135	25.095	15.52	5.013	0.230427	-2.11762	0.006929	0.01984
Klk1b4	15.482	5.462	1.516	0.49	0.230579	-2.11667	0.05864	0.07309
Id1	150.507	53.097	35.696	11.53	0.231621	-2.11016	0.0008714	0.006938
Col7a1	26.355	9.298	4.339	1.401	0.233152	-2.10066	0.03362	0.06736
Gabra4	13.161	4.643	1.012	0.327	0.235159	-2.08829	0.05864	0.07309
Cth	31.099	10.971	5.645	1.823	0.23582	-2.08424	0.05394	0.09783
Mgll	32.767	11.56	6.106	1.972	0.236624	-2.07933	0.02953	0.05562
Serpini1	55.674	19.641	12.03	3.886	0.236713	-2.07879	0.009921	0.02953
Igf1	62.346	21.995	13.808	4.46	0.237443	-2.07435	0.005351	0.01643
Tc2n	29.276	10.328	5.284	1.707	0.238965	-2.06513	0.05472	0.09945
Rims4	21.37	7.539	3.346	1.081	0.243705	-2.03679	0.06296	0.1265
Rab3d	168.392	59.406	42.575	13.751	0.244198	-2.03388	0.001034	0.004761
Sdf2l1	290.134	102.355	75.35	24.337	0.245145	-2.02829	0.0001946	0.001673
C1qa	27.172	9.586	5.057	1.633	0.248725	-2.00738	0.05472	0.09945
Penk	41.975	14.808	9.08	2.933	0.248798	-2.00695	0.02356	0.04427
Edem2	298.259	105.221	78.79	25.449	0.249	-2.00578	0.0002041	0.001739
Lrg1	94.615	33.379	23.574	7.614	0.25056	-1.99677	0.006794	0.01794
Try4	2765.81	975.738	756.249	244.262	0.251103	-1.99365	1.376e-05	0.0004765
Nna1	31.852	11.237	6.429	2.077	0.251451	-1.99165	0.05394	0.09783
Wars	455.143	160.568	122.751	39.648	0.251584	-1.99089	0.0001289	0.001875
Gm2663	1260.95	444.845	346.279	111.845	0.253104	-1.9822	2.914e-05	0.0006132
CRLM3	18.887	6.663	2.932	0.947	0.254078	-1.97666	0.1191	0.1232
Klk1b3	19.087	6.734	3.033	0.98	0.256012	-1.96571	0.1191	0.1232
Anxa10	56.648	19.985	13.626	4.401	0.257374	-1.95806	0.009921	0.02953
Sult1c2	35.613	12.564	7.747	2.502	0.258183	-1.95353	0.04257	0.07748
AK007531	8.821	3.112	0.207	0.067	0.259484	-1.94628	0.2396	0.2525
Tspan13	102.804	36.268	26.845	8.671	0.259499	-1.9462	0.004502	0.01935
Ffar2	9.612	3.391	0.443	0.143	0.260305	-1.94172	0.2396	0.2525
Rarres1	11.352	4.005	0.954	0.308	0.261339	-1.93601	0.1174	0.1327
Gls2	123.719	43.646	33.062	10.679	0.261591	-1.93461	0.002985	0.01285
Gnmt	36.084	12.73	8.042	2.597	0.261981	-1.93247	0.04257	0.07748
Reg2	6955.64	2453.85	1999.53	645.832	0.263492	-1.92417	3.262e-05	0.0006407
Tdh	15.822	5.582	2.312	0.747	0.265421	-1.91365	0.1167	0.2154
Ccbl2	16.445	5.802	2.496	0.806	0.26551	-1.91316	0.1167	0.2154
Hapln4	12.128	4.279	1.247	0.403	0.26577	-1.91175	0.1174	0.1327
Dhrs3	52.698	18.591	13.04	4.212	0.266041	-1.91028	0.01762	0.03149
Gif	8.476	2.99	0.21	0.068	0.267669	-1.90148	0.2396	0.2525
Tmem97	445.138	157.038	128.908	41.636	0.269783	-1.89013	0.0002064	0.002532
Nphs1	14	4.939	1.899	0.613	0.271595	-1.88047	0.2044	0.377
Ctrc	13.169	4.646	1.659	0.536	0.272051	-1.87805	0.2044	0.377
2210010C04Rik	2723.11	960.674	808.446	261.121	0.272567	-1.87532	4.512e-05	0.001382
Gamt	232.186	81.912	66.91	21.611	0.272711	-1.87456	0.0009554	0.006562
Serpinf2	17.057	6.017	2.848	0.92	0.273621	-1.86975	0.1167	0.2154
Nupr1	4865.31	1716.41	1455.07	469.976	0.274236	-1.86651	4.409e-05	0.001441
Bdh2	11.416	4.027	1.175	0.38	0.274518	-1.86503	0.1174	0.1327
Mia1	64.847	22.877	17.227	5.564	0.274909	-1.86297	0.01626	0.04372
C1rl	21.003	7.41	4.065	1.313	0.27503	-1.86234	0.1191	0.1232
Pigr	122.704	43.288	34.87	11.263	0.276892	-1.8526	0.003152	0.01351
Bclp2	11.92	4.205	1.373	0.443	0.277233	-1.85083	0.1174	0.1327
Agtpbp1	24.216	8.543	5.102	1.648	0.277481	-1.84954	0.09298	0.1657
Sec61b	166.761	58.831	48.536	15.677	0.278735	-1.84303	0.00252	0.01045
Pipox	24.093	8.5	5.236	1.691	0.283263	-1.81978	0.09298	0.1657
Gna14	16.177	5.707	2.819	0.911	0.284926	-1.81134	0.1167	0.2154
Ly6k	10.184	3.593	0.962	0.311	0.285434	-1.80877	0.1174	0.1327
Gfra1	11.182	3.945	1.281	0.414	0.285945	-1.80619	0.1174	0.1327
Bex2	50.347	17.762	13.517	4.366	0.286004	-1.8059	0.01804	0.05183
Ptp4a3	60.413	21.313	16.817	5.432	0.288262	-1.79455	0.01375	0.03779
GDNFR-alpha	10.676	3.766	1.209	0.39	0.291649	-1.77769	0.1174	0.1327
Slc12a8	79.214	27.946	23.07	7.451	0.291957	-1.77617	0.01041	0.02813
4930415O20Rik	12.527	4.419	1.846	0.596	0.294519	-1.76357	0.3577	0.3783
Gal	12.08	4.262	1.702	0.55	0.294565	-1.76334	0.3577	0.3783
Cml1	10.285	3.628	1.128	0.364	0.294728	-1.76255	0.1174	0.1327
Lgals1	717.15	253	229.086	73.993	0.295248	-1.76	0.0002872	0.003481
Sec14l4	13.081	4.615	2.036	0.658	0.29528	-1.75984	0.2044	0.377
Reep5	197.283	69.599	61.749	19.944	0.296661	-1.75311	0.001911	0.01196
Aqp8	14.208	5.012	2.52	0.814	0.30173	-1.72867	0.2044	0.377
Matn4	71.779	25.323	21.605	6.978	0.303081	-1.72222	0.01883	0.04925
Aldh1a7	66.814	23.571	19.998	6.459	0.303569	-1.7199	0.01544	0.04178
Padi2	8.249	2.91	0.581	0.188	0.303836	-1.71863	0.2396	0.2525
Serp1	574.148	202.551	188.429	60.861	0.303909	-1.71829	0.000552	0.005988
Slc41a1	178.237	62.879	58.238	18.81	0.310118	-1.68911	0.00348	0.02047
Fbp2	14.91	5.26	2.942	0.95	0.311502	-1.68269	0.2044	0.377
Unc5a	8.074	2.848	0.626	0.202	0.31237	-1.67867	0.2396	0.2525
Gjb2	59.839	21.11	18.294	5.909	0.312483	-1.67815	0.02796	0.07188
Myb	12.282	4.333	2.081	0.672	0.31352	-1.67337	0.3577	0.3783
Nr0b2	53.478	18.866	16.246	5.247	0.314457	-1.66907	0.03876	0.06339
Lbh	234.666	82.787	78.666	25.408	0.31518	-1.66575	0.002296	0.01391
Nucb2	295.435	104.225	99.636	32.182	0.315343	-1.66501	0.00162	0.01564
Cbs	344.316	121.47	117.029	37.799	0.316804	-1.65834	0.001751	0.01069
Cckar	488.379	172.293	168.305	54.361	0.319465	-1.64627	0.00111	0.01098
Zg16	3416.36	1205.24	1191.06	384.703	0.319756	-1.64496	0.0004258	0.004711
Fut8	66.754	23.55	21.384	6.907	0.322077	-1.63452	0.03148	0.07875
Vipr1	16.516	5.827	3.711	1.199	0.322103	-1.6344	0.1167	0.2154
Acacb	18.733	6.609	4.494	1.452	0.32225	-1.63375	0.1191	0.1232
Adm2	25.601	9.032	6.919	2.235	0.322468	-1.63277	0.09298	0.1657
Sel1l	328.606	115.927	113.858	36.775	0.323065	-1.6301	0.001862	0.01712
C2cd4a	7.169	2.529	0.444	0.143	0.323888	-1.62643	0.2396	0.2525
Retnlb	6.316	2.228	0.144	0.047	0.324349	-1.62438	0.4915	0.4983
Ces1e	6.755	2.383	0.307	0.099	0.32486	-1.62211	0.4915	0.4983
Fbxo16	26.503	9.35	7.345	2.372	0.325797	-1.61795	0.09298	0.1657
Sec11c	200.508	70.736	69.432	22.426	0.326558	-1.61459	0.003826	0.02242
Fam174b	104.983	37.036	35.361	11.421	0.326559	-1.61458	0.01044	0.0402
Npw	8.815	3.11	1.073	0.347	0.327737	-1.60939	0.2396	0.2525
Hsbp1l1	16.972	5.987	4.047	1.307	0.330185	-1.59865	0.1167	0.2154
Isoc2b	20.916	7.379	5.52	1.783	0.33214	-1.59014	0.167	0.2771
BC019819	40.393	14.25	12.714	4.107	0.334885	-1.57826	0.0899	0.1448
Stc2	21.723	7.664	5.931	1.916	0.336565	-1.57104	0.16	0.2789
Bmp7	57.473	20.276	19.115	6.174	0.337187	-1.56838	0.04528	0.1153
Scd1	11.23	3.962	2.117	0.684	0.339379	-1.55903	0.3577	0.3783
Cela2a	7118.64	2511.35	2638.63	852.256	0.339624	-1.55799	0.0005829	0.009338
Gstm7	39.106	13.796	12.48	4.031	0.340024	-1.55629	0.0899	0.1448
Cel	7505.76	2647.92	2790.44	901.289	0.340625	-1.55374	0.0005934	0.009405
Slc39a11	101.531	35.819	35.96	11.615	0.342622	-1.54531	0.01979	0.07049
Tmed3	239.242	84.401	88.002	28.424	0.344539	-1.53726	0.004933	0.02667
Cpa2	4183.53	1475.89	1577.26	509.442	0.34562	-1.53274	0.0006813	0.00971
Fetub	66.664	23.518	23.204	7.495	0.34648	-1.52916	0.03148	0.07875
Ang	65.966	23.272	22.969	7.419	0.346861	-1.52757	0.03184	0.07975
Fam195a	27.539	9.715	8.424	2.721	0.34727	-1.52587	0.122	0.2038
Fam25c	7.289	2.571	0.768	0.248	0.349482	-1.51671	0.2396	0.2525
slc26a6	12.566	4.433	2.805	0.906	0.350819	-1.5112	0.3577	0.3783
Pde2a	14.54	5.13	3.569	1.153	0.351223	-1.50954	0.2044	0.377
Arfgef3	14.792	5.218	3.673	1.186	0.35156	-1.50816	0.2044	0.377
Ift20	113.705	40.113	41.693	13.466	0.35186	-1.50693	0.01315	0.04715
Brsk2	7.443	2.626	0.853	0.276	0.351903	-1.50675	0.2396	0.2525
D10Bwg1379e	15.11	5.331	3.812	1.231	0.352393	-1.50474	0.2044	0.377
Slc35c2	80.598	28.434	29.068	9.389	0.352959	-1.50243	0.02516	0.09348
Bmp3	6.544	2.309	0.529	0.171	0.353883	-1.49865	0.4915	0.4983
Fam46c	76.889	27.125	27.823	8.987	0.355093	-1.49373	0.04003	0.09377
Rab27a	29.011	10.235	9.329	3.013	0.357187	-1.48525	0.122	0.2038
D630039A03Rik	10.238	3.612	2.037	0.658	0.359497	-1.47595	0.3577	0.3783
Chid1	40.42	14.26	13.93	4.499	0.360354	-1.47251	0.0899	0.1448
Casp9	64.469	22.744	23.516	7.595	0.361986	-1.46599	0.05854	0.1366
1700019D03Rik	8.991	3.172	1.581	0.511	0.362176	-1.46524	0.6123	0.6221
Arhgdig	166.31	58.672	64.115	20.709	0.363805	-1.45876	0.01222	0.06181
Gstm1	171.273	60.423	66.27	21.405	0.364766	-1.45496	0.01182	0.04063
Clca2	16.776	5.918	4.721	1.525	0.36499	-1.45407	0.2689	0.4402
Bet1	50.739	17.9	18.297	5.91	0.365608	-1.45163	0.0743	0.1818
Gstk1	16.742	5.906	4.733	1.529	0.366203	-1.44928	0.2689	0.4402
Gm5771	1090.43	384.688	439.688	142.016	0.370807	-1.43126	0.002274	0.01804
Lgi2	10.349	3.651	2.244	0.725	0.370888	-1.43094	0.3577	0.3783
Slc7a3	14.829	5.231	4.08	1.318	0.372011	-1.42658	0.2044	0.377
AK007907	7.258	2.561	1.01	0.326	0.372367	-1.4252	0.2396	0.2525
Slc26a6	11.568	4.081	2.776	0.897	0.373352	-1.42139	0.3577	0.3783
Fam83f	17.816	6.285	5.33	1.722	0.373644	-1.42026	0.2689	0.4402
Pycr2	96.352	33.992	37.44	12.093	0.374171	-1.41823	0.03218	0.07472
BC114417	11.099	3.916	2.609	0.843	0.374898	-1.41543	0.3577	0.3783
Nphs1as	7.477	2.638	1.16	0.375	0.377955	-1.40371	0.2396	0.2525
Gck	15.902	5.61	4.68	1.512	0.38003	-1.39581	0.2689	0.4402
Chst2	85.516	30.169	33.612	10.856	0.380378	-1.3945	0.04805	0.1078
Spdef	47.313	16.691	17.783	5.744	0.381211	-1.39134	0.07774	0.1812
Ptgr1	70.398	24.835	27.646	8.929	0.384324	-1.37961	0.06473	0.1459
Slc35b1	115.621	40.789	46.633	15.062	0.38436	-1.37947	0.02497	0.08223
Bckdk	87.969	31.034	35.389	11.43	0.388025	-1.36578	0.03134	0.1058
Hes7	8.492	2.996	1.728	0.558	0.38989	-1.35886	0.6123	0.6221
Krtcap2	347.473	122.583	146.172	47.212	0.390118	-1.35802	0.007968	0.03786
Grhl3	6.185	2.182	0.787	0.254	0.394092	-1.3434	0.4915	0.4983
Fut1	7.844	2.767	1.508	0.487	0.394744	-1.34101	0.2396	0.2525
1810041L15Rik	5.982	2.11	0.705	0.228	0.394855	-1.3406	0.4915	0.4983
Slc7a8	49.845	17.585	19.86	6.415	0.398978	-1.32562	0.0743	0.1818
C2cd4b	37.033	13.065	14.362	4.639	0.400924	-1.3186	0.1651	0.2572
Atp2c2	7.371	2.6	1.376	0.444	0.401111	-1.31793	0.2396	0.2525
Mt2	774.635	273.28	338.782	109.424	0.402596	-1.3126	0.006794	0.04474
St6galnac4	13.072	4.612	3.918	1.265	0.403599	-1.309	0.2044	0.377
Mir1895	6.848	2.416	1.177	0.38	0.403981	-1.30764	0.4915	0.4983
Mlec	200.936	70.887	86.981	28.094	0.404719	-1.30501	0.01673	0.07349
Deb1	39.269	13.854	15.555	5.024	0.405547	-1.30206	0.1076	0.254
Atoh8	13.135	4.634	3.986	1.287	0.405928	-1.3007	0.2044	0.377
Myo15b	50.802	17.922	20.688	6.682	0.405982	-1.30051	0.1315	0.1992
Rnase4	312.35	110.193	136.827	44.194	0.406446	-1.29886	0.01306	0.05748
Rftn2	6.236	2.2	0.933	0.301	0.406562	-1.29845	0.4915	0.4983
Klk1b11	6.321	2.23	0.976	0.315	0.407121	-1.29647	0.4915	0.4983
Cpb1	7066.91	2493.1	3144.39	1015.61	0.407606	-1.29475	0.005306	0.03459
Acss1	8.217	2.899	1.836	0.593	0.408566	-1.29136	0.6123	0.6221
AK046216	31.136	10.984	12.096	3.907	0.409463	-1.2882	0.1493	0.3544
Syt15	11.018	3.887	3.109	1.004	0.410068	-1.28607	0.3577	0.3783
Galntl6	5.819	2.053	0.78	0.252	0.410088	-1.28599	0.4915	0.4983
Gm13011	4.643	1.638	0.255	0.082	0.410159	-1.28574	0.4915	0.4983
Xbp1	967.184	341.209	431.859	139.487	0.41053	-1.28444	0.007404	0.04717
S100g	13.514	4.768	4.237	1.369	0.410714	-1.28379	0.2044	0.377
okadin_type_I	12.405	4.376	3.76	1.214	0.41183	-1.27988	0.3577	0.3783
Ghr	97.463	34.384	42.213	13.634	0.413577	-1.27377	0.05968	0.1815
Efr3b	5.876	2.073	0.854	0.276	0.415229	-1.26802	0.4915	0.4983
Ssr4	372.07	131.261	167.346	54.051	0.41623	-1.26455	0.01466	0.06214
Foxred2	10.772	3.8	3.103	1.002	0.417083	-1.26159	0.3577	0.3783
Gm5409	16.655	5.876	5.789	1.87	0.417394	-1.26052	0.2689	0.4402
Srm	104.086	36.72	45.65	14.745	0.417418	-1.26044	0.06193	0.1285
Pcsk6	32.026	11.298	12.876	4.159	0.419499	-1.25326	0.1493	0.3544
Paip2b	76.082	26.841	33.15	10.707	0.420495	-1.24984	0.07675	0.1655
Cyfip2	16.811	5.931	5.942	1.919	0.421151	-1.24759	0.2689	0.4402
Cyb5b	110.45	38.965	49.048	15.842	0.421419	-1.24667	0.04415	0.1321
5330417C22Rik	201.877	71.219	91.778	29.644	0.42432	-1.23677	0.02781	0.1142
Sycn	2749.93	970.136	1280.38	413.552	0.426873	-1.22812	0.009095	0.05357
Dap	635.919	224.343	294.935	95.262	0.42718	-1.22708	0.01181	0.06957
Hnmt	7.045	2.485	1.525	0.493	0.428407	-1.22294	0.4915	0.4983
AK007818	3.769	1.33	0	0	0.429185	-1.22033	1	1
Trabd	141.225	49.822	64.658	20.884	0.430601	-1.21558	0.0512	0.1467
Ociad2	31.188	11.003	12.921	4.173	0.430976	-1.21432	0.1493	0.3544
Fxyd6	35.113	12.387	14.772	4.771	0.43109	-1.21394	0.2541	0.3788
BC017612	41.363	14.592	17.735	5.728	0.431503	-1.21256	0.1841	0.2746
Tmem56	8.721	3.077	2.354	0.76	0.43169	-1.21193	0.6123	0.6221
Orai2	11.792	4.16	3.808	1.23	0.432171	-1.21033	0.3577	0.3783
Gcnt1	16.405	5.787	5.992	1.935	0.432444	-1.20941	0.2689	0.4402
Dnajc3	132.284	46.668	60.731	19.616	0.432491	-1.20926	0.04998	0.1446
Gcdh	53.801	18.98	23.773	7.678	0.434334	-1.20312	0.1432	0.3068
AK019053	18.511	6.53	7.035	2.272	0.434529	-1.20248	0.167	0.2771
Sytl1	47.721	16.835	20.925	6.759	0.435043	-1.20077	0.1333	0.2912
Nr1d1	98.179	34.636	45.178	14.592	0.437535	-1.19253	0.06427	0.1873
Glp1r	9.453	3.335	2.777	0.897	0.437601	-1.19231	0.6123	0.6221
Cyp2c70	6.143	2.167	1.195	0.386	0.437638	-1.19219	0.4915	0.4983
Qdpr	85.315	30.098	39.063	12.617	0.437874	-1.19141	0.08686	0.1811
Dnajc12	18.975	6.694	7.342	2.371	0.438134	-1.19056	0.167	0.2771
Dnajb11	210.282	74.184	99.027	31.985	0.438724	-1.18862	0.02967	0.1179
Ufsp2	67.872	23.944	30.833	9.959	0.439344	-1.18658	0.1089	0.23
Ctsl	1848.82	652.237	886.155	286.221	0.439689	-1.18545	0.009896	0.05659
Tnip3	5.582	1.969	0.955	0.308	0.440552	-1.18261	0.4915	0.4983
Aldh9a1	82.085	28.958	37.776	12.201	0.44065	-1.18229	0.08112	0.1714
Mgmt	18.089	6.382	6.978	2.254	0.440802	-1.1818	0.2689	0.4402
Ttyh1	25.871	9.127	10.768	3.478	0.442184	-1.17728	0.1963	0.3184
Gm15450	13.445	4.743	4.822	1.557	0.445238	-1.16735	0.4305	0.6819
Sepx1	140.909	49.711	66.863	21.596	0.445584	-1.16623	0.0539	0.1517
Pbld2	6.781	2.392	1.586	0.512	0.445755	-1.16568	1	1
Matn2	10.54	3.718	3.42	1.105	0.446164	-1.16436	0.3577	0.3783
Klk1b8	4.001	1.411	0.236	0.076	0.446288	-1.16395	1	1
Ccdc30	8.658	3.054	2.508	0.81	0.446473	-1.16336	0.6123	0.6221
Sulf2	87.611	30.908	41.03	13.252	0.446659	-1.16275	0.08577	0.1769
Gmppb	84.014	29.639	39.435	12.737	0.44835	-1.1573	0.08686	0.1811
Mthfd2	66.843	23.581	31.098	10.044	0.44929	-1.15428	0.1089	0.23
Gda	6.067	2.14	1.278	0.413	0.45	-1.152	0.4915	0.4983
Lgals2	35.895	12.663	16.008	5.17	0.451585	-1.14693	0.1651	0.2572
ENSMUSG00000073777	25.352	8.944	10.83	3.498	0.452333	-1.14454	0.1963	0.3184
Lrmp	108.654	38.332	52.102	16.829	0.453295	-1.14148	0.07075	0.198
Tram1	207.581	73.232	101.082	32.649	0.453295	-1.14148	0.04535	0.1246
Bpgm	37.343	13.174	16.796	5.425	0.453295	-1.14148	0.1651	0.2572
Qsox2	58.128	20.507	27.14	8.766	0.454085	-1.13897	0.1544	0.2252
Clps	6786.28	2394.1	3366.24	1087.27	0.454372	-1.13805	0.01146	0.08479
Fn5	40.946	14.445	18.661	6.027	0.454969	-1.13616	0.1851	0.4022
Slc17a9	14.967	5.28	5.759	1.86	0.455414	-1.13475	0.4305	0.6819
Ssr1	127.432	44.956	61.71	19.932	0.455479	-1.13454	0.07588	0.1503
Aarsd1	73.551	25.948	34.944	11.287	0.455952	-1.13305	0.1165	0.2393
Nudt22	40.498	14.287	18.534	5.986	0.45699	-1.12977	0.1851	0.4022
Kirrel3	20.482	7.226	8.573	2.769	0.458181	-1.12601	0.3185	0.488
Azgp1	9.495	3.35	3.078	0.994	0.458391	-1.12535	0.6123	0.6221
1700003E16Rik	6.717	2.37	1.69	0.546	0.458754	-1.12421	1	1
Reep6	34.281	12.094	15.566	5.028	0.460364	-1.11915	0.2541	0.3788
D230014K01Rik	15.996	5.643	6.379	2.06	0.460635	-1.1183	0.2689	0.4402
Asb16	4.266	1.505	0.477	0.154	0.460679	-1.11817	0.4915	0.4983
Id3	136.823	48.269	67.216	21.71	0.460939	-1.11735	0.08063	0.2161
Engase	15.986	5.64	6.38	2.061	0.460994	-1.11718	0.2689	0.4402
Bckdhb	28.617	10.096	12.79	4.131	0.462419	-1.11273	0.2284	0.3537
Gstt2	42.056	14.837	19.593	6.328	0.462714	-1.11181	0.1841	0.2746
Pdk1	21.572	7.61	9.272	2.995	0.463995	-1.10782	0.3136	0.4905
Pdia6	493.816	174.211	249.135	80.469	0.464977	-1.10477	0.0288	0.1054
Mtfp1	17.533	6.185	7.264	2.346	0.465692	-1.10255	0.2689	0.4402
1110003E01Rik	70.286	24.796	34.255	11.064	0.467669	-1.09644	0.1167	0.2406
Nup62cl	47.308	16.69	22.56	7.287	0.468457	-1.09401	0.1333	0.2912
Dcxr	20.973	7.399	9.103	2.94	0.469103	-1.09202	0.3185	0.488
Pm20d1	13.861	4.89	5.465	1.765	0.46944	-1.09099	0.4305	0.6819
1200002N14Rik	43.945	15.503	20.953	6.768	0.470702	-1.08711	0.1995	0.2951
Aass	4.2	1.482	0.525	0.17	0.471394	-1.08499	1	1
Zfp9	15.403	5.434	6.319	2.041	0.472645	-1.08117	0.4305	0.6819
Prom2	3.779	1.333	0.327	0.106	0.474068	-1.07683	1	1
Phgdh	55.966	19.744	27.418	8.856	0.475125	-1.07362	0.1548	0.3193
Dram1	46.261	16.32	22.388	7.231	0.475231	-1.0733	0.1995	0.2951
Ppapdc1b	105.593	37.252	53.285	17.211	0.47608	-1.07072	0.1026	0.2013
Ssr3	280.144	98.831	144.056	46.529	0.476095	-1.07068	0.05424	0.1391
Rrbp1	487.614	172.023	252.37	81.513	0.47689	-1.06827	0.03128	0.15
P4hb	1709.97	603.253	894.581	288.942	0.479835	-1.05939	0.02529	0.1207
Angptl1	6.319	2.229	1.715	0.554	0.481264	-1.0551	1	1
Cnpy2	204.71	72.219	106.15	34.286	0.481924	-1.05312	0.06921	0.176
2010317E24Rik	12.96	4.572	5.221	1.686	0.482053	-1.05274	0.4305	0.6819
Atp13a2	66.717	23.537	33.645	10.867	0.483637	-1.048	0.121	0.2462
4933404O12Rik	6.024	2.125	1.588	0.513	0.48416	-1.04644	1	1
Adra2a	10.787	3.805	4.112	1.328	0.484495	-1.04544	0.3577	0.3783
Nuak1	56.524	19.941	28.325	9.149	0.484647	-1.04499	0.1548	0.3193
syt_XV-a	5.957	2.102	1.566	0.506	0.485493	-1.04248	1	1
Rps27l	222.394	78.457	116.418	37.602	0.485823	-1.0415	0.07343	0.1838
LOC100042049	94.012	33.166	48.395	15.631	0.48677	-1.03869	0.1456	0.2763
Pex11c	25.02	8.827	11.721	3.786	0.487026	-1.03793	0.348	0.5199
Atf5	124.332	43.863	64.611	20.869	0.487462	-1.03664	0.08205	0.2164
Pecr	38.877	13.715	19.118	6.175	0.487598	-1.03624	0.1851	0.4022
Slc30a2	15.125	5.336	6.471	2.09	0.487689	-1.03597	0.4305	0.6819
2010300C02Rik	34.599	12.206	16.898	5.458	0.48902	-1.03203	0.2541	0.3788
C630004H02Rik	121.305	42.795	63.274	20.437	0.489485	-1.03066	0.07807	0.2108
Gale	53.078	18.725	26.853	8.673	0.490393	-1.02799	0.2275	0.3234
Slc1a3	4.087	1.442	0.614	0.198	0.490581	-1.02744	1	1
Prelid2	13.776	4.86	5.808	1.876	0.490785	-1.02684	0.4305	0.6819
Tmem221	17.427	6.148	7.778	2.512	0.491326	-1.02525	0.4808	0.7137
AK007947	3.274	1.155	0.182	0.059	0.491415	-1.02499	1	1
1110017F19Rik	21.291	7.511	9.875	3.19	0.492304	-1.02238	0.3136	0.4905
Spcs3	88.324	31.159	45.969	14.848	0.492801	-1.02092	0.1408	0.2719
Serpinb1a	207.438	73.181	110.16	35.581	0.493132	-1.01995	0.07271	0.1848
Dagla	9.234	3.258	3.415	1.103	0.493894	-1.01773	0.6123	0.6221
Creld2	206.507	72.853	110.015	35.534	0.494685	-1.01542	0.07271	0.1848
Rhov	178.095	62.829	94.833	30.63	0.495543	-1.01292	0.09756	0.2397
AK192544	149.58	52.77	79.497	25.677	0.496132	-1.0112	0.0902	0.2302
Susd2	4.499	1.587	0.878	0.284	0.496328	-1.01063	0.4915	0.4983
Lman1	139.98	49.383	74.339	24.011	0.496417	-1.01037	0.08791	0.2263
Manf	207.952	73.362	111.224	35.924	0.496544	-1.01001	0.07271	0.1848
Gstp1	228.798	80.717	122.62	39.605	0.496898	-1.00898	0.07543	0.1876
Ifitm3	1022.27	360.642	553.298	178.711	0.496931	-1.00888	0.03679	0.1652
Slc22a1	10.122	3.571	3.94	1.273	0.497265	-1.00791	0.3577	0.3783
Pex11g	22.732	8.02	10.801	3.489	0.497672	-1.00673	0.3136	0.4905
Aldh18a1	104.054	36.709	55.108	17.799	0.498528	-1.00425	0.109	0.2851
3110040N11Rik	29.677	10.47	14.632	4.726	0.499215	-1.00227	0.3769	0.5454
Cd6	3.033	1.07	0.108	0.035	0.5	-1	1	1
Ppapdc3	7.047	2.486	2.304	0.744	0.500287	-0.999173	1	1
HtrA2	70.844	24.993	37.223	12.023	0.50102	-0.997061	0.1811	0.3501
Lrrc7	4.85	1.711	1.11	0.359	0.501291	-0.99628	0.4915	0.4983
Uba5	80.137	28.271	42.567	13.749	0.503878	-0.988855	0.196	0.3658
Ak3	127.386	44.94	68.602	22.158	0.504092	-0.98824	0.119	0.2225
Nrp2	16.36	5.772	7.481	2.416	0.50443	-0.987274	0.2689	0.4402
Myrip	3.449	1.217	0.367	0.119	0.504736	-0.986399	1	1
vesl-2	21.529	7.595	10.341	3.34	0.504945	-0.985803	0.3136	0.4905
Fxyd3	160.054	56.465	86.958	28.087	0.506169	-0.982309	0.09414	0.2362
Dhx34	145.459	51.316	79.036	25.528	0.507072	-0.979736	0.1295	0.3145
AK050464	3.492	1.232	0.409	0.132	0.507168	-0.979463	1	1
Edaradd	6.975	2.461	2.343	0.757	0.507657	-0.978075	1	1
C030006K11Rik	13.454	4.746	5.935	1.917	0.507658	-0.978073	0.4305	0.6819
Metrn	8.73	3.08	3.322	1.073	0.508088	-0.976849	0.6123	0.6221
Homer2	22.446	7.919	10.951	3.537	0.508689	-0.975143	0.5177	0.5256
Bcat2	119.949	42.316	65.181	21.053	0.509119	-0.973925	0.1175	0.2981
Slc7a11	5.695	2.009	1.654	0.534	0.509804	-0.971986	1	1
Snord64	3.848	1.358	0.63	0.203	0.510178	-0.970927	1	1
Fam3b	3.977	1.403	0.704	0.227	0.510612	-0.969701	1	1
Rint1	31.88	11.247	16.279	5.258	0.510982	-0.968655	0.2566	0.3852
Srp19	90.006	31.753	48.827	15.771	0.512045	-0.965658	0.1469	0.2808
Spc24	28.678	10.117	14.53	4.693	0.512099	-0.965507	0.3769	0.5454
Mettl1	36.576	12.903	18.992	6.134	0.513127	-0.962613	0.2752	0.4019
AK012387	7.604	2.683	2.758	0.891	0.51344	-0.961732	0.6123	0.6221
Isoc2a	22.134	7.809	10.982	3.547	0.516177	-0.954063	0.5177	0.5256
Pdx1	41.806	14.749	22.093	7.136	0.516604	-0.952869	0.2041	0.419
Enho	5.706	2.013	1.724	0.557	0.516761	-0.952432	1	1
Snd1	334.664	118.065	187.495	60.559	0.51702	-0.951708	0.06473	0.2063
Slc2a5	5.081	1.793	1.382	0.446	0.517723	-0.949748	0.4915	0.4983
Prss3	1600.33	564.573	904.128	292.026	0.518105	-0.948685	0.04158	0.1743
Cox7b	101.96	35.97	56.312	18.188	0.519015	-0.946151	0.1549	0.2875
Gsta4	111.676	39.398	61.887	19.989	0.519555	-0.94465	0.1632	0.2973
Ndufb9	264.753	93.401	148.853	48.078	0.519889	-0.943726	0.08275	0.264
Tmem54	26.884	9.484	13.809	4.46	0.520794	-0.941216	0.348	0.5199
Cda	32.471	11.455	17.003	5.492	0.521236	-0.93999	0.2566	0.3852
Itln1	7.04	2.484	2.537	0.819	0.522101	-0.937599	1	1
Soat2	16.334	5.762	7.846	2.534	0.522626	-0.936148	0.4808	0.7137
Atp5k	89.938	31.729	49.88	16.111	0.522809	-0.935645	0.1469	0.2808
Tmem219	35.113	12.387	18.572	5.999	0.522821	-0.935612	0.2817	0.5656
Mcfd2	208.356	73.505	117.54	37.964	0.522972	-0.935195	0.1071	0.2531
Dbt	49.52	17.47	26.869	8.678	0.523985	-0.932403	0.3254	0.451
Fbxo5	7.488	2.642	2.818	0.91	0.524437	-0.931158	0.6123	0.6221
Mid1	43.125	15.214	23.271	7.516	0.525225	-0.928992	0.3123	0.5957
Stard5	17.903	6.316	8.819	2.848	0.52597	-0.926946	0.4808	0.7137
Lcmt1	73.496	25.928	40.772	13.169	0.526181	-0.926369	0.1888	0.3588
Ptger3	86.185	30.405	48.089	15.532	0.526413	-0.925733	0.2089	0.3811
Atp5g1	45.5	16.052	24.7	7.978	0.526507	-0.925475	0.3118	0.4353
Ndufc1	61.565	21.719	33.947	10.965	0.526652	-0.925079	0.178	0.3453
Ica1	73.475	25.921	40.812	13.182	0.526801	-0.924671	0.1888	0.3588
Sybu	4.586	1.618	1.175	0.38	0.52712	-0.923797	0.4915	0.4983
1810006K21Rik	217.179	76.618	123.582	39.916	0.527146	-0.923726	0.1095	0.2566
Asns	290.563	102.506	166.35	53.73	0.528762	-0.919311	0.0866	0.2697
Uchl5	72.206	25.473	40.292	13.014	0.52937	-0.917653	0.1922	0.3628
slp1	28.244	9.964	14.875	4.805	0.52946	-0.917406	0.3769	0.5454
Lmo4	109.672	38.691	61.975	20.017	0.529516	-0.917255	0.1632	0.2973
AK182549	9.125	3.219	3.839	1.24	0.530932	-0.913402	0.6123	0.6221
Entpd3	10.229	3.609	4.488	1.45	0.531569	-0.911672	0.3577	0.3783
Abcb6	17.551	6.192	8.747	2.825	0.531841	-0.910933	0.4808	0.7137
Slc9a9	5.744	2.026	1.897	0.613	0.533047	-0.907666	1	1
Nme2	315.307	111.236	182.25	58.865	0.533385	-0.906751	0.08964	0.2741
AK135004	3.059	1.079	0.342	0.11	0.533911	-0.90533	1	1
Rpl26	164.02	57.864	94.398	30.49	0.534962	-0.902492	0.09995	0.2452
Thrb	7.638	2.695	3.038	0.981	0.53613	-0.899345	0.6123	0.6221
Xylt1	15.514	5.473	7.658	2.473	0.536536	-0.898252	0.4305	0.6819
Akr1c12	42.817	15.105	23.708	7.657	0.537535	-0.89557	0.3123	0.5957
Asnsd1	53.912	19.019	30.23	9.764	0.537689	-0.895156	0.2426	0.4599
Pcca	27.438	9.68	14.687	4.744	0.537828	-0.894784	0.3769	0.5454
Tmprss4	48.452	17.093	27.049	8.737	0.538164	-0.893882	0.3254	0.451
Ccdc24	8.477	2.991	3.558	1.149	0.538462	-0.893085	0.6123	0.6221
Dapk2	4.684	1.652	1.327	0.429	0.538839	-0.892075	0.4915	0.4983
Mrps24	48.648	17.162	27.226	8.794	0.539258	-0.890953	0.3254	0.451
Gmds	29.947	10.565	16.241	5.246	0.540078	-0.888761	0.2566	0.3852
Cdk5rap3	100.032	35.29	57.628	18.613	0.540452	-0.887762	0.2245	0.3956
Pabpc4	50.427	17.79	28.353	9.158	0.540607	-0.887349	0.2288	0.4477
1700028J19Rik	4.245	1.498	1.096	0.354	0.542034	-0.883546	1	1
Galk1	122.89	43.354	71.352	23.046	0.542138	-0.883267	0.1741	0.312
BC004004	32.979	11.635	18.113	5.85	0.542145	-0.88325	0.2817	0.5656
AK217058	3.347	1.181	0.566	0.183	0.542412	-0.88254	1	1
Edem1	121.388	42.824	70.532	22.781	0.542648	-0.881912	0.1741	0.312
Tmem208	87.457	30.854	50.447	16.294	0.542915	-0.881203	0.2089	0.3788
Fgf21	3.272	1.154	0.528	0.171	0.54364	-0.879277	1	1
Extl3	58.291	20.564	33.227	10.732	0.544055	-0.878176	0.2498	0.4693
Aldh2	141.772	50.015	82.888	26.772	0.544389	-0.87729	0.1362	0.3216
Fads2	102.676	36.223	59.66	19.27	0.544556	-0.876848	0.1616	0.3944
Tmem141	14.023	4.947	6.932	2.239	0.544644	-0.876614	0.4305	0.6819
6430548M08Rik	12.318	4.346	5.924	1.913	0.544893	-0.875954	0.6718	0.6836
AK168746	10.894	3.843	5.09	1.644	0.545943	-0.873179	0.6718	0.6836
Galnt2	168.315	59.379	98.967	31.966	0.545985	-0.873068	0.1431	0.331
Arhgap26	10.888	3.841	5.109	1.65	0.547408	-0.869313	0.6718	0.6836
Uqcrq	197.474	69.666	116.703	37.694	0.547562	-0.868906	0.1123	0.3404
Macrod1	20.398	7.196	10.804	3.49	0.547828	-0.868205	0.3185	0.488
Ppib	1062.62	374.877	634.616	204.976	0.547988	-0.867784	0.08186	0.2353
2210010C17Rik	62.012	21.877	35.745	11.545	0.548367	-0.866785	0.2606	0.4788
Lyar	63.41	22.37	36.587	11.817	0.548438	-0.866599	0.2606	0.4788
Mecr	63.043	22.241	36.406	11.759	0.548987	-0.865157	0.2606	0.4788
Gdf15	36.969	13.042	20.784	6.713	0.549281	-0.864384	0.4214	0.5814
Gm12612	55.533	19.591	31.973	10.327	0.550095	-0.862248	0.2388	0.46
IHABP	17.648	6.226	9.213	2.976	0.550235	-0.861879	0.4808	0.7137
Sgpp1	9.012	3.179	4.028	1.301	0.55061	-0.860897	0.6123	0.6221
Pstk	20.058	7.076	10.673	3.447	0.550644	-0.860809	0.3185	0.488
Slc16a5	23.711	8.365	12.897	4.166	0.551628	-0.858231	0.5177	0.5256
Creg1	37.044	13.069	20.939	6.763	0.551781	-0.857834	0.4214	0.5814
Snord37	16.264	5.738	8.415	2.718	0.551796	-0.857794	0.4808	0.7137
Ndufs8	97.311	34.33	57.267	18.497	0.551854	-0.857642	0.1597	0.3898
F2	11.019	3.887	5.256	1.698	0.552077	-0.857059	0.6718	0.6836
Klk1b24	2.574	0.908	0.177	0.057	0.553983	-0.852086	1	1
Gpd1	23.865	8.419	13.062	4.219	0.554093	-0.8518	0.5177	0.5256
Slc10a5	2.85	1.005	0.344	0.111	0.554115	-0.851743	1	1
Polr3k	38.204	13.478	21.756	7.027	0.554427	-0.85093	0.4214	0.5814
Rangrf	3.319	1.171	0.635	0.205	0.555044	-0.849327	1	1
BC048355	11.703	4.129	5.722	1.848	0.555274	-0.848728	0.6718	0.6836
Gpx2	44.098	15.557	25.424	8.212	0.556381	-0.845855	0.3118	0.4353
Fam13a	30.156	10.639	16.954	5.476	0.556405	-0.845792	0.2566	0.3852
Ndufb10	163.302	57.611	97.879	31.614	0.556448	-0.84568	0.145	0.3334
Rpl22l1	348.163	122.827	210.36	67.945	0.556785	-0.844808	0.09706	0.2839
Slc38a5	25.69	9.063	14.25	4.603	0.556792	-0.844789	0.543	0.7546
Rfng	20.77	7.327	11.26	3.637	0.556863	-0.844605	0.5181	0.7373
Ube2c	68.822	24.279	40.518	13.087	0.557261	-0.843575	0.2678	0.4863
Gfi1	7.177	2.532	3.001	0.969	0.557475	-0.843022	0.6123	0.6221
Gm10334	123.143	43.443	73.645	23.787	0.557726	-0.842373	0.1802	0.4146
Ddt	45.287	15.977	26.23	8.472	0.557931	-0.841841	0.3118	0.4353
Stra13	50.664	17.874	29.512	9.532	0.558016	-0.841621	0.3383	0.466
Mrps21	69.585	24.549	41.106	13.277	0.558809	-0.839574	0.1922	0.3628
radical-fringe	23.562	8.312	13.015	4.204	0.558849	-0.83947	0.5177	0.5256
Lrrc59	453.041	159.826	275.195	88.886	0.558902	-0.839332	0.1016	0.2915
Rexo2	78.545	27.71	46.622	15.059	0.559352	-0.838171	0.2046	0.3772
Gtf3a	59.366	20.943	34.924	11.28	0.559632	-0.83745	0.2498	0.4693
Rnf141	28.289	9.98	15.983	5.162	0.561202	-0.833407	0.3769	0.5454
Snx22	187.872	66.279	113.848	36.772	0.561423	-0.832839	0.1524	0.3427
Pcmtd1	14.978	5.284	7.827	2.528	0.561426	-0.832833	0.7084	1
Gm5088	42.398	14.957	24.658	7.964	0.56176	-0.831975	0.3123	0.5957
Itpka	5.419	1.912	1.973	0.637	0.562157	-0.830956	1	1
Plxna2	14.562	5.137	7.604	2.456	0.563142	-0.82843	0.4305	0.6819
Etv5	24.202	8.538	13.536	4.372	0.563221	-0.828227	0.348	0.5199
Gstm2	74.845	26.404	44.735	14.449	0.56375	-0.826873	0.2016	0.4939
Guk1	72.526	25.586	43.419	14.024	0.565109	-0.823398	0.2016	0.4939
BC003331	29.659	10.463	16.964	5.479	0.56521	-0.823142	0.3769	0.5454
Cdkn2c	6.307	2.225	2.549	0.823	0.565271	-0.822985	1	1
Cabp1	3.954	1.395	1.097	0.354	0.565344	-0.822798	1	1
Gfer	23.279	8.212	13.046	4.214	0.566001	-0.821124	0.5177	0.5256
Fam71a	15.214	5.367	8.074	2.608	0.566672	-0.819414	0.7084	1
Mlycd	28.175	9.94	16.101	5.2	0.566728	-0.819273	0.3769	0.5454
Hgfac	34.853	12.296	20.248	6.54	0.567088	-0.818356	0.4231	0.5868
Hddc3	20.508	7.235	11.363	3.67	0.567092	-0.818346	0.5181	0.7373
B230118H07Rik	8.906	3.142	4.178	1.349	0.567117	-0.818281	0.6123	0.6221
Kel	3.985	1.406	1.145	0.37	0.56941	-0.812461	1	1
Ggt1	151.332	53.388	92.843	29.988	0.569758	-0.811579	0.1939	0.4304
Dhrs4	76.246	26.898	46.165	14.911	0.570328	-0.810137	0.2834	0.4999
Cxxc4	3.551	1.253	0.886	0.286	0.570794	-0.808957	1	1
Mpv17l	5.123	1.807	1.866	0.603	0.571072	-0.808255	1	1
Myo16	10.855	3.829	5.456	1.762	0.571961	-0.806011	0.6718	0.6836
Arhgef38	5.753	2.03	2.278	0.736	0.572937	-0.803551	1	1
H47	164.363	57.985	101.563	32.804	0.573095	-0.803154	0.2003	0.4367
Fxy	26.077	9.2	15.014	4.849	0.573431	-0.802307	0.543	0.7546
Birc5	30.255	10.674	17.647	5.7	0.573925	-0.801066	0.4017	0.5675
Klf15	21.151	7.462	11.96	3.863	0.574687	-0.799152	0.5181	0.7373
Wdyhv1	25.101	8.855	14.452	4.668	0.57514	-0.798016	0.543	0.7546
Clptm1l	159.329	56.209	98.833	31.922	0.575469	-0.79719	0.1984	0.4349
Myl10	2.246	0.792	0.101	0.033	0.576451	-0.79473	1	1
Sec16b	18.274	6.447	10.207	3.297	0.577011	-0.79333	0.4808	0.7137
AK052594	7.011	2.473	3.108	1.004	0.577023	-0.7933	1	1
Kdelr3	43.035	15.182	25.816	8.338	0.577061	-0.793204	0.3123	0.5957
Ttpa	5.914	2.086	2.418	0.781	0.577122	-0.793051	1	1
Tmem8	34.404	12.137	20.385	6.584	0.577301	-0.792605	0.4231	0.5868
Cenpv	16.853	5.945	9.32	3.01	0.577394	-0.792372	0.4808	0.7137
Uck2	110.383	38.942	68.331	22.07	0.577588	-0.791889	0.2377	0.4098
D10Wsu52e	344.816	121.646	216.675	69.984	0.578771	-0.788934	0.134	0.3709
Dhtkd1	3.373	1.19	0.829	0.268	0.578995	-0.788376	1	1
Thyn1	48.431	17.086	29.363	9.484	0.579675	-0.786684	0.3254	0.451
Ostc	151.098	53.305	94.507	30.525	0.580517	-0.784589	0.199	0.4348
Eef1g	79.426	28.02	49.07	15.849	0.5806	-0.784385	0.2902	0.5061
CABP1Lb	3.817	1.347	1.127	0.364	0.581167	-0.782974	1	1
Ndufs6	84.856	29.936	52.614	16.994	0.581652	-0.781771	0.2969	0.5111
2810417H13Rik	19.115	6.743	10.849	3.504	0.581687	-0.781686	0.5181	0.7373
Sec13	137.711	48.582	86.272	27.865	0.582167	-0.780495	0.1909	0.4265
1110008F13Rik	58.44	20.617	35.876	11.588	0.582319	-0.780117	0.3603	0.4836
Csda	181.024	63.863	113.85	36.773	0.58235	-0.78004	0.2079	0.444
Exosc5	30.539	10.774	18.133	5.857	0.582385	-0.779955	0.4017	0.5675
IRAK1-S	94.725	33.418	58.982	19.051	0.582573	-0.779489	0.2289	0.5205
Cd55	13.203	4.658	7.114	2.298	0.582891	-0.778701	0.4305	0.6819
Arl6ip4	68.863	24.294	42.567	13.749	0.583103	-0.778178	0.2811	0.4977
Ola1	45.833	16.169	27.915	9.016	0.583377	-0.7775	0.3287	0.6063
AK206687	91.711	32.354	57.158	18.462	0.583498	-0.7772	0.2222	0.3973
Chac2	13.495	4.761	7.313	2.362	0.583579	-0.777	0.4305	0.6819
Cib2	5.825	2.055	2.424	0.783	0.583633	-0.776866	1	1
Cisd1	27.866	9.831	16.482	5.324	0.58388	-0.776257	0.3769	0.5454
Tpd52l1	10.824	3.819	5.618	1.815	0.584146	-0.775599	0.6718	0.6836
Tbccd1	18.602	6.563	10.586	3.419	0.584292	-0.775239	0.3185	0.488
Pcbd1	223.323	78.785	141.411	45.675	0.58501	-0.773468	0.1651	0.3588
Kctd14	15.123	5.335	8.38	2.707	0.585162	-0.773093	0.7084	1
Gh	2.778	0.98	0.494	0.16	0.585859	-0.771376	1	1
AK188991	107.615	37.965	67.615	21.839	0.586141	-0.770679	0.2388	0.4143
Pmm1	39.259	13.85	23.854	7.705	0.586195	-0.770547	0.4375	0.5958
Ndufaf2	26.608	9.387	15.77	5.094	0.586695	-0.769318	0.543	0.7546
Irak1	83.226	29.361	52.058	16.814	0.58674	-0.769208	0.2969	0.5125
Lias	29.686	10.473	17.753	5.734	0.586943	-0.768707	0.5639	0.7669
Mrpl42	31.294	11.04	18.783	6.067	0.58696	-0.768666	0.4017	0.5675
mKIAA0134	95.241	33.6	59.816	19.32	0.587283	-0.767872	0.2252	0.3992
Slc17a5	13.869	4.893	7.637	2.467	0.588325	-0.765314	0.4305	0.6819
Gstm6	2.704	0.954	0.463	0.15	0.588536	-0.764797	1	1
Stx18	53.986	19.045	33.441	10.801	0.588725	-0.764333	0.3504	0.6246
Sla2	23.972	8.457	14.156	4.572	0.589193	-0.763187	0.5469	0.7558
Gpr89	40.441	14.267	24.756	7.996	0.589245	-0.763061	0.4375	0.5958
Maob	3.25	1.147	0.825	0.266	0.58966	-0.762045	1	1
Nans	70.664	24.929	44.263	14.297	0.589957	-0.761318	0.2763	0.4939
mimitin	25.344	8.941	15.067	4.867	0.590182	-0.760768	0.543	0.7546
Dnajc22	43.431	15.322	26.789	8.653	0.59141	-0.757769	0.4521	0.6091
AK050866	3.597	1.269	1.058	0.342	0.59145	-0.757672	1	1
Ankrd22	4.602	1.624	1.716	0.554	0.592226	-0.755781	1	1
Man1a	44.285	15.623	27.385	8.845	0.592252	-0.755718	0.3287	0.6063
Farsb	82.096	28.962	51.869	16.753	0.592517	-0.755071	0.2969	0.5125
Gmppa	79.467	28.035	50.169	16.204	0.592526	-0.755049	0.2902	0.5061
Ndufa1	89.822	31.688	56.888	18.374	0.592695	-0.754639	0.2222	0.3973
Arfgap3	101.649	35.86	64.571	20.856	0.592946	-0.754027	0.2367	0.5285
BC030476	22.01	7.765	13.003	4.2	0.593269	-0.753242	0.5177	0.5256
Ndufs5	23.477	8.282	13.973	4.513	0.593945	-0.751598	0.5469	0.7558
Gmfg	2.7	0.953	0.499	0.161	0.59447	-0.750324	1	1
Fam149a	43.009	15.173	26.674	8.615	0.594509	-0.750229	0.4521	0.6091
AB347565	8.037	2.835	3.963	1.28	0.594524	-0.750193	0.6123	0.6221
Iah1	38.106	13.443	23.5	7.59	0.594752	-0.74964	0.4418	0.7859
BC053978	3.475	1.226	1.005	0.325	0.595238	-0.748461	1	1
BC145376	1.922	0.678	0	0	0.595948	-0.746743	1	1
Bola1	22.613	7.978	13.476	4.353	0.596235	-0.746046	0.5177	0.5256
Rnf187	101.395	35.771	64.791	20.927	0.596312	-0.74586	0.2367	0.5285
D17Wsu104e	174.905	61.704	112.762	36.421	0.596788	-0.744709	0.2063	0.4426
Atp5j2	228.004	80.437	147.375	47.601	0.596793	-0.744698	0.2239	0.4593
Fah	21.454	7.569	12.74	4.115	0.596919	-0.744393	0.5177	0.5256
Acot11	6.484	2.287	2.98	0.963	0.597201	-0.743711	1	1
Mt3	3.621	1.277	1.115	0.36	0.597277	-0.743528	1	1
Chi3l4	2.265	0.799	0.232	0.075	0.597554	-0.742859	1	1
Syt3	2.627	0.927	0.472	0.152	0.59782	-0.742216	1	1
Gnat2	2.714	0.957	0.527	0.17	0.597854	-0.742135	1	1
Cog6	31.045	10.952	19.047	6.152	0.598394	-0.740833	0.4017	0.5675
Gpx2-ps1	10.314	3.639	5.501	1.777	0.59862	-0.740287	0.6718	0.6836
AK083296	1.962	0.692	0.039	0.013	0.5987	-0.740095	1	1
Creb3l4	5.775	2.037	2.541	0.821	0.599605	-0.737916	1	1
Hpdl	3.655	1.289	1.155	0.373	0.599825	-0.737386	1	1
Bckdha	98.432	34.725	63.27	20.436	0.600028	-0.736898	0.231	0.4064
Iyd	4.499	1.587	1.719	0.555	0.601082	-0.734365	1	1
cip7	4.443	1.567	1.685	0.544	0.60148	-0.733411	1	1
Chchd7	39.342	13.879	24.617	7.951	0.601586	-0.733157	0.4375	0.5958
Areg	41.948	14.799	26.333	8.505	0.60162	-0.733075	0.4521	0.6091
Prdx4	139.99	49.386	90.924	29.368	0.602707	-0.730471	0.261	0.4331
Sprr2a1	3.064	1.081	0.791	0.255	0.603075	-0.72959	1	1
Prss2	6655.21	2347.86	4382.86	1415.63	0.603112	-0.729501	0.1298	0.3312
Dbp	14.909	5.26	8.6	2.778	0.603514	-0.72854	0.7084	1
AK040418	2.181	0.769	0.209	0.068	0.603731	-0.728022	1	1
Ccng1	109.888	38.767	71.246	23.012	0.603817	-0.727816	0.2438	0.5354
Nudcd2	43.079	15.198	27.2	8.785	0.604087	-0.727172	0.4521	0.6091
Lage3	27.447	9.683	16.885	5.454	0.604137	-0.727051	0.3769	0.5454
AK029599	1.857	0.655	0	0	0.60423	-0.726831	1	1
Mt1	1198.92	422.963	790.188	255.224	0.604355	-0.726533	0.1619	0.4025
Ccdc56	91.079	32.131	58.903	19.025	0.604419	-0.72638	0.3078	0.5217
Extl1	3.695	1.304	1.218	0.393	0.604601	-0.725945	1	1
Znrd1as	6.241	2.202	2.897	0.936	0.604622	-0.725894	1	1
Nomo1	130.219	45.939	84.775	27.382	0.604657	-0.725811	0.2552	0.4279
Nhp2	117.152	41.33	76.194	24.61	0.605008	-0.724973	0.2539	0.5422
2210404O07Rik	9.868	3.481	5.299	1.712	0.605222	-0.724464	1	1
Dad1	169.447	59.778	110.825	35.796	0.605416	-0.724	0.2096	0.446
mKIAA0387	31.295	11.04	19.485	6.293	0.605731	-0.723251	0.4017	0.5675
Parm1	132.719	46.821	86.73	28.013	0.6067	-0.720945	0.2584	0.4326
Galnt7	109.785	38.731	71.57	23.117	0.607007	-0.720215	0.2438	0.5354
Hibch	30.344	10.705	18.917	6.11	0.607433	-0.719203	0.4017	0.5675
Fam165b	58.576	20.665	37.664	12.165	0.607662	-0.718659	0.3603	0.4836
5730437N04Rik	71.584	25.254	46.324	14.962	0.607984	-0.717896	0.3859	0.65
Def6	3.929	1.386	1.395	0.451	0.608131	-0.717547	1	1
Gata4	115.447	40.728	75.626	24.427	0.609351	-0.714655	0.246	0.4212
Gbgt1	2.941	1.038	0.749	0.242	0.609421	-0.714489	1	1
AK007899	7.038	2.483	3.478	1.123	0.609532	-0.714226	1	1
Cenpm	11.435	4.034	6.41	2.07	0.609853	-0.713467	0.6718	0.6836
Stard13	47.97	16.923	30.747	9.931	0.609887	-0.713387	0.3438	0.6164
Kcnip2	2.682	0.946	0.578	0.187	0.609969	-0.713192	1	1
XT-I	14.072	4.964	8.168	2.638	0.609993	-0.713135	0.7084	1
Sord	30.863	10.888	19.365	6.255	0.610279	-0.712459	0.4017	0.5675
Gng10	38.738	13.666	24.651	7.962	0.611073	-0.710583	0.4375	0.5958
Prodh	9.295	3.279	5.007	1.617	0.611591	-0.70936	1	1
Ndufb2	83.577	29.485	54.645	17.65	0.611776	-0.708924	0.4056	0.6626
Spcs2	91.401	32.245	59.899	19.347	0.612032	-0.708321	0.3078	0.5217
mThy28	38.346	13.528	24.435	7.892	0.612059	-0.708256	0.4375	0.5958
Robld3	130.707	46.112	86.217	27.847	0.612307	-0.707673	0.2601	0.5492
Impdh1	92.704	32.705	60.855	19.656	0.612847	-0.706402	0.3134	0.5272
Cope	362.474	127.876	241.492	78	0.612992	-0.706059	0.1876	0.479
Ttc7	22.428	7.912	13.837	4.469	0.613667	-0.704472	0.5177	0.5256
mD53	6.902	2.435	3.431	1.108	0.613683	-0.704435	1	1
Csrp2	171.684	60.568	113.926	36.797	0.613907	-0.703909	0.2126	0.4491
Acot13	46.768	16.499	30.166	9.743	0.613921	-0.703876	0.4653	0.6213
AK131895	1.909	0.673	0.087	0.028	0.614465	-0.702597	1	1
Fam189a2	12.715	4.486	7.341	2.371	0.614473	-0.702578	0.6718	0.6836
Hyou1	240.471	84.835	160.209	51.746	0.614505	-0.702504	0.2288	0.4647
AK018959	18.456	6.511	11.211	3.621	0.615231	-0.7008	0.5181	0.7373
Ly6c1	18.557	6.547	11.286	3.645	0.615476	-0.700225	0.5181	0.7373
Cdh2	9.712	3.426	5.342	1.725	0.61568	-0.699747	1	1
Cenp-a	24.048	8.484	14.985	4.84	0.615774	-0.699527	0.5469	0.7558
Hmmr	12.355	4.359	7.126	2.302	0.61616	-0.698624	0.6718	0.6836
Arhgap9	4.207	1.484	1.647	0.532	0.616747	-0.697249	1	1
Nxn	9.282	3.275	5.069	1.637	0.616842	-0.697027	1	1
Bpnt1	55.743	19.665	36.374	11.749	0.616937	-0.696805	0.3618	0.6321
Dixdc1	7.257	2.56	3.705	1.197	0.617135	-0.696342	0.6123	0.6221
4933417G07Rik	11.713	4.132	6.711	2.168	0.617303	-0.695949	0.6718	0.6836
Arl4a	17.549	6.191	10.652	3.441	0.617578	-0.695308	0.4808	0.7137
Fxyd1	5.83	2.057	2.751	0.889	0.617926	-0.694494	1	1
Rnf186	7.983	2.816	4.206	1.359	0.618187	-0.693886	0.6123	0.6221
Ptprn2	33.926	11.969	21.744	7.023	0.618629	-0.692854	0.4231	0.5868
AK076947	2.523	0.89	0.525	0.17	0.619048	-0.691878	1	1
Gemin6	11.576	4.084	6.652	2.149	0.619394	-0.69107	0.6718	0.6836
Uqcr	57.832	20.402	37.965	12.262	0.619662	-0.690447	0.3618	0.6321
Srprb	102.188	36.05	68.001	21.964	0.619811	-0.6901	0.3222	0.5342
Slc25a5	233.758	82.466	157.086	50.737	0.619857	-0.689992	0.2296	0.4667
Cdc25c	5.462	1.927	2.525	0.816	0.62043	-0.688659	1	1
Uqcr11	82.805	29.212	55.021	17.771	0.621309	-0.686616	0.4056	0.6626
Grhpr	76.295	26.916	50.652	16.36	0.621866	-0.685325	0.2929	0.5093
Ccpg1	98.867	34.879	65.982	21.312	0.621868	-0.68532	0.3177	0.5295
Tspan5	17.431	6.149	10.671	3.447	0.622045	-0.684909	0.4808	0.7137
Thop1	68.364	24.118	45.316	14.637	0.622542	-0.683758	0.3865	0.65
2310028O11Rik	45.172	15.936	29.592	9.558	0.623406	-0.681757	0.4653	0.6213
Htra2	68.292	24.092	45.358	14.65	0.623705	-0.681065	0.3865	0.65
Rpl41	319.739	112.799	216.755	70.01	0.623995	-0.680394	0.1877	0.4768
Scfd2	14.038	4.952	8.41	2.716	0.624328	-0.679624	0.7084	1
Vkorc1	88.405	31.188	59.14	19.102	0.624518	-0.679184	0.3103	0.5254
Sstr2	5.735	2.023	2.751	0.889	0.624876	-0.678358	1	1
Commd3	113.561	40.063	76.451	24.693	0.625697	-0.676464	0.3341	0.5446
Acad11	16.616	5.862	10.206	3.296	0.626057	-0.675635	0.4808	0.7137
Trib3	33.057	11.662	21.452	6.929	0.626204	-0.675294	0.4231	0.5868
1810030N24Rik	16.257	5.735	9.965	3.219	0.626429	-0.674777	0.4808	0.7137
Vmac	17.42	6.146	10.773	3.48	0.626924	-0.673637	0.4808	0.7137
Ptpla	16.361	5.772	10.054	3.247	0.627141	-0.673138	0.4808	0.7137
Cenpa	24.719	8.721	15.784	5.098	0.627302	-0.672769	0.543	0.7546
Tomm7	49.556	17.483	32.829	10.603	0.627766	-0.671701	0.4774	0.8037
Parf	98.48	34.742	66.429	21.456	0.62828	-0.670519	0.3177	0.5295
Snurf	12.017	4.239	7.095	2.292	0.628364	-0.670327	0.6718	0.6836
Dusp23	8.368	2.952	4.594	1.484	0.628543	-0.669918	0.6123	0.6221
Maoa	12.282	4.333	7.286	2.353	0.628727	-0.669495	0.6718	0.6836
Rprm	5.411	1.909	2.568	0.829	0.628738	-0.669468	1	1
Cope1	112.876	39.821	76.4	24.677	0.629014	-0.668835	0.3341	0.5446
5930403L14Rik	11.695	4.126	6.89	2.225	0.629146	-0.668534	0.6718	0.6836
Ift46	27.454	9.685	17.719	5.723	0.6292	-0.66841	0.5639	0.7669
Sec61g	13.712	4.837	8.276	2.673	0.629262	-0.668268	0.7084	1
Hs3st3b1	2.503	0.883	0.575	0.186	0.629846	-0.666929	1	1
Sntb1	81.328	28.691	54.809	17.703	0.629922	-0.666756	0.4056	0.6626
Crls1	47.563	16.78	31.608	10.209	0.630427	-0.665598	0.3438	0.6164
Poll	17.591	6.206	10.973	3.544	0.630586	-0.665236	0.7336	1
Zfp503	34.758	12.262	22.801	7.365	0.63075	-0.664861	0.4231	0.5868
Rplp1	1107.91	390.855	762.363	246.237	0.63094	-0.664425	0.1671	0.5042
Cisd3	7.448	2.628	3.994	1.29	0.631202	-0.663827	0.6123	0.6221
Rpl27a	45.396	16.015	30.181	9.748	0.631678	-0.662739	0.4653	0.6213
Nde1	30.573	10.786	19.96	6.447	0.631851	-0.662343	0.4017	0.5675
Kng2	5.73	2.021	2.814	0.909	0.63191	-0.662209	1	1
Cdk2ap2	86.99	30.689	58.902	19.025	0.631923	-0.66218	0.3103	0.5254
Xpot	29.417	10.378	19.208	6.204	0.633152	-0.659377	0.5639	0.7669
Nepn	3.145	1.11	1.042	0.337	0.633649	-0.658244	1	1
Npm3-ps1	23.327	8.229	15.01	4.848	0.633655	-0.658231	0.5469	0.7558
D10Jhu81e	54.207	19.123	36.409	11.76	0.6341	-0.657217	0.4861	0.6352
Fn3k	2.162	0.763	0.366	0.118	0.634146	-0.657112	1	1
Ifrd2	68.218	24.066	46.124	14.898	0.634246	-0.656887	0.3865	0.65
Lrig3	8.175	2.884	4.532	1.464	0.634398	-0.656541	0.6123	0.6221
Mrps17	43.677	15.409	29.14	9.412	0.63453	-0.65624	0.4521	0.6091
Thnsl2	15.825	5.583	9.84	3.178	0.634665	-0.655933	0.4808	0.7137
D030028A08Rik	11.381	4.015	6.76	2.183	0.634696	-0.655863	0.6718	0.6836
Mettl7a1	12.953	4.57	7.851	2.536	0.634829	-0.655559	0.7084	1
Srp9	42.603	15.03	28.413	9.177	0.634872	-0.655462	0.4521	0.6091
Ank	10.2	3.598	5.943	1.92	0.635059	-0.655038	0.6718	0.6836
Lor2	10.033	3.539	5.83	1.883	0.635162	-0.654804	0.6718	0.6836
AK143417	4.27	1.506	1.834	0.592	0.635275	-0.654546	1	1
AK007719	21.151	7.462	13.566	4.382	0.63602	-0.652856	0.5181	0.7373
Insig1	63.722	22.48	43.183	13.948	0.636627	-0.65148	0.3828	0.6463
Bola3	15.262	5.384	9.491	3.066	0.636905	-0.65085	0.7084	1
Glt1d1	3.92	1.383	1.604	0.518	0.637012	-0.650607	1	1
1110008P14Rik	29.476	10.399	19.387	6.262	0.637073	-0.650468	0.5639	0.7669
Ogfod2	25.798	9.101	16.842	5.44	0.637561	-0.649366	0.543	0.7546
Obfc2b	88.715	31.297	60.664	19.594	0.637644	-0.649176	0.4158	0.6698
Rfk	60.755	21.433	41.238	13.32	0.638345	-0.647591	0.3726	0.6393
Upp1	16.991	5.994	10.73	3.466	0.638547	-0.647135	0.4808	0.7137
Dusp26	2.109	0.744	0.352	0.114	0.638761	-0.646651	1	1
Mphosph10	45.172	15.936	30.489	9.848	0.640529	-0.642664	0.4653	0.6213
0910001L09Rik	41.151	14.517	27.688	8.943	0.640781	-0.642097	0.4521	0.6091
Prosapip1	24.351	8.591	15.938	5.148	0.641018	-0.641564	0.543	0.7546
AK139076	3.403	1.201	1.273	0.411	0.641072	-0.641441	1	1
1700021F05Rik	29.859	10.534	19.81	6.398	0.641408	-0.640686	0.4017	0.5675
Lgi4	8.77	3.094	5.035	1.626	0.641426	-0.640644	1	1
Prdm5	5.421	1.912	2.686	0.868	0.641484	-0.640516	1	1
Fkbp2	145.4	51.295	100.805	32.559	0.641725	-0.639973	0.3576	0.5638
1810010D01Rik	5.944	2.097	3.063	0.989	0.642234	-0.638828	1	1
Mettl9	82.08	28.957	56.517	18.255	0.642755	-0.63766	0.4056	0.6626
Cox7a2l	112.208	39.585	77.67	25.087	0.642774	-0.637616	0.3341	0.5446
D930020B18Rik	2.189	0.772	0.431	0.139	0.642777	-0.637611	1	1
4F2_lc	107.336	37.867	74.26	23.985	0.642833	-0.637484	0.3314	0.5438
Bok	96.453	34.027	66.637	21.523	0.643018	-0.637068	0.4253	0.6755
Suclg1	91.211	32.178	62.961	20.336	0.643077	-0.636937	0.3168	0.6696
9930023K05Rik	9.697	3.421	5.709	1.844	0.643293	-0.636451	1	1
Rps6	14.529	5.126	9.12	2.946	0.64414	-0.634554	0.7084	1
Kif19a	3.3	1.164	1.222	0.395	0.64464	-0.633435	1	1
Lypd6b	1.873	0.661	0.22	0.071	0.644792	-0.633094	1	1
2310061C15Rik	7.804	2.753	4.396	1.42	0.644817	-0.633037	0.6123	0.6221
Pdap1	91.588	32.311	63.432	20.488	0.645072	-0.632467	0.3168	0.6696
AK161599	3.739	1.319	1.537	0.496	0.645106	-0.632393	1	1
Ramp1	21.297	7.513	13.911	4.493	0.645248	-0.632073	0.5177	0.5256
0610011F06Rik	84.731	29.892	58.644	18.942	0.645539	-0.631423	0.4108	0.6662
2010011I20Rik	19.966	7.044	13.004	4.2	0.646445	-0.629401	0.5181	0.7373
Lpin3	40.84	14.408	27.78	8.973	0.647261	-0.62758	0.4584	0.7926
Top2a	58.353	20.586	40.162	12.972	0.647271	-0.627557	0.3726	0.6393
Rps6ka6	7.954	2.806	4.534	1.464	0.647399	-0.627273	0.6123	0.6221
Klf4	229.726	81.044	161.42	52.137	0.647665	-0.626681	0.3018	0.5824
B4galt4	18.523	6.535	12.022	3.883	0.648042	-0.62584	0.5181	0.7373
AK212710	15.559	5.489	9.926	3.206	0.648174	-0.625547	0.7084	1
Abhd14a	17.013	6.002	10.97	3.543	0.648815	-0.624122	0.7336	1
Id2	251.102	88.585	177.018	57.175	0.649383	-0.622858	0.2389	0.5858
AK030236	3.511	1.239	1.406	0.454	0.649397	-0.622827	1	1
Mut	25.557	9.016	17.056	5.509	0.64986	-0.621799	0.5701	0.7706
Pde9a	2.486	0.877	0.682	0.22	0.649973	-0.621548	1	1
AK005641	2.746	0.969	0.867	0.28	0.650076	-0.621319	1	1
Hrsp12	55.337	19.522	38.208	12.341	0.650083	-0.621305	0.3618	0.6321
Grpr	2.201	0.776	0.481	0.155	0.650338	-0.620739	1	1
Myh13	1.535	0.542	0.009	0.003	0.650454	-0.620481	1	1
Ggta1	35.616	12.565	24.236	7.828	0.650792	-0.619731	0.4418	0.7859
Naip7	5.384	1.899	2.747	0.887	0.650914	-0.619461	1	1
Srp68	174.719	61.638	123.199	39.792	0.651234	-0.618752	0.2881	0.572
Kdm1b	20.601	7.268	13.586	4.388	0.651669	-0.617789	0.5181	0.7373
1810074P20Rik	25.623	9.039	17.162	5.543	0.651758	-0.617591	0.5701	0.7706
Atp5g3	493.931	174.252	350.573	113.232	0.651816	-0.617464	0.2623	0.4966
LE51	35.12	12.39	23.93	7.729	0.651904	-0.617268	0.5965	0.7867
Pls1	57.907	20.429	40.183	12.979	0.65234	-0.616303	0.4949	0.6437
Mpp6	34.309	12.104	23.377	7.551	0.652549	-0.615842	0.5965	0.7867
Iscu	10.703	3.776	6.558	2.118	0.652848	-0.615182	0.6718	0.6836
Cad	51.96	18.331	35.978	11.621	0.652889	-0.61509	0.4884	0.808
Gpr108	63.216	22.302	44.031	14.222	0.653249	-0.614296	0.3828	0.6463
Klb	7.737	2.73	4.45	1.437	0.653351	-0.614069	0.6123	0.6221
Gm13253	25.323	8.934	17.001	5.491	0.653413	-0.613934	0.543	0.7546
Ssr2	488.168	172.219	347.441	112.221	0.653629	-0.613456	0.2622	0.4971
mKIAA0621	6.562	2.315	3.613	1.167	0.653695	-0.61331	1	1
AI646023	3.857	1.361	1.684	0.544	0.65396	-0.612725	1	1
2510006D16Rik	137.637	48.556	97.257	31.413	0.654068	-0.612487	0.272	0.5577
Batf	4.864	1.716	2.407	0.777	0.654271	-0.61204	1	1
BC042789	2.45	0.864	0.682	0.22	0.654506	-0.611521	1	1
Slc9a3r2	32.744	11.552	22.346	7.218	0.654716	-0.611058	0.4231	0.5868
Fam158a	6.18	2.18	3.351	1.082	0.654717	-0.611057	1	1
Aes	542.286	191.311	386.779	124.926	0.654804	-0.610865	0.2656	0.608
BC002163	37.7	13.3	25.9	8.365	0.654895	-0.610664	0.4418	0.7859
Brp16	17.756	6.264	11.641	3.76	0.655286	-0.609803	0.7336	1
Dctpp1	73.968	26.095	51.884	16.758	0.655398	-0.609558	0.4023	0.6609
Zcchc17	24.583	8.673	16.541	5.343	0.655743	-0.608798	0.543	0.7546
Pycard	5.728	2.021	3.037	0.981	0.655743	-0.608797	1	1
Ufl1	23.085	8.144	15.473	4.998	0.655949	-0.608344	0.5469	0.7558
DQ688151	21.167	7.467	14.1	4.554	0.655958	-0.608324	0.7522	1
Sars	187.847	66.27	133.525	43.127	0.655968	-0.608302	0.2933	0.5762
Mrpl12	76.15	26.865	53.551	17.297	0.65663	-0.606847	0.3992	0.6588
Ydjc	12.813	4.52	8.128	2.625	0.656703	-0.606687	0.7084	1
Sil1	64.268	22.673	45.039	14.547	0.65674	-0.606606	0.5107	0.6531
Clec2d	4.977	1.756	2.512	0.811	0.657112	-0.605789	1	1
Slc7a5	102.119	36.026	72.253	23.337	0.657295	-0.605387	0.3298	0.6779
Mir3058	2.901	1.023	1.022	0.33	0.657439	-0.60507	1	1
Dexi	20.847	7.355	13.911	4.493	0.657451	-0.605046	0.5181	0.7373
Rnaseh2c	82.881	29.239	58.483	18.89	0.65776	-0.604367	0.4118	0.6676
Efcab4b	1.595	0.563	0.091	0.029	0.658349	-0.603075	1	1
Rpl36al	142.944	50.429	101.789	32.877	0.658714	-0.602276	0.3586	0.6964
Cdk20	11.392	4.019	7.149	2.309	0.659295	-0.601005	0.6718	0.6836
B3gnt8	10.202	3.599	6.294	2.033	0.659491	-0.600575	0.6718	0.6836
Coq9	57.593	20.318	40.441	13.062	0.65963	-0.60027	0.4949	0.6437
B230208H17Rik	48.89	17.248	34.182	11.041	0.659853	-0.599783	0.4774	0.8037
Mrpl13	129.595	45.719	92.398	29.844	0.660202	-0.59902	0.3509	0.6919
Copz1	136.05	47.996	97.137	31.374	0.660748	-0.597828	0.3527	0.5605
1700040I03Rik	11.703	4.129	7.4	2.39	0.660948	-0.597392	0.6718	0.6836
Dram2	62.323	21.987	43.987	14.207	0.661548	-0.596083	0.3828	0.6463
Ppa1	99.838	35.221	71.11	22.968	0.661716	-0.595717	0.4293	0.6785
Slc11a2	29.093	10.264	19.991	6.457	0.662021	-0.595052	0.5639	0.7669
Calcb	1.879	0.663	0.314	0.101	0.662057	-0.594974	1	1
AK207593	138.573	48.887	99.198	32.04	0.662297	-0.59445	0.3556	0.695
1810020D17Rik	10.819	3.817	6.784	2.191	0.662446	-0.594126	0.6718	0.6836
5730409E04Rik	2.629	0.927	0.859	0.277	0.662688	-0.593598	1	1
BC037369	13.444	4.743	8.688	2.806	0.66272	-0.593529	0.7084	1
MRPS17	71.302	25.154	50.571	16.334	0.662767	-0.593427	0.3946	0.6555
3110001D03Rik	26.296	9.277	18.011	5.817	0.663326	-0.59221	0.5701	0.7706
Rpl14	143.603	50.661	103.022	33.275	0.66346	-0.591919	0.3576	0.5638
Sdsl	45.405	16.018	31.877	10.296	0.663768	-0.59125	0.4653	0.6213
Hddc2	30.643	10.81	21.194	6.845	0.664268	-0.590164	0.5815	0.7775
Commd5	14.791	5.218	9.698	3.132	0.664522	-0.58961	0.7084	1
Psph	17.392	6.136	11.588	3.743	0.664658	-0.589316	0.7336	1
Nr1h3	10.672	3.765	6.721	2.171	0.665477	-0.587538	0.6718	0.6836
Ttc38	10.022	3.536	6.25	2.019	0.665564	-0.58735	0.6718	0.6836
2210021J22Rik	20.606	7.269	13.946	4.504	0.665619	-0.587232	0.7522	1
Ctage5	119.107	42.019	85.603	27.649	0.665962	-0.586489	0.3497	0.6891
Kcnab3	2.046	0.722	0.455	0.147	0.666086	-0.58622	1	1
Fam125a	66.859	23.587	47.615	15.379	0.666165	-0.586048	0.3865	0.65
Aagab	33.374	11.774	23.254	7.511	0.666275	-0.58581	0.5965	0.7867
Pbk	24.004	8.468	16.439	5.31	0.666455	-0.58542	0.5469	0.7558
Ndufb8	98.311	34.683	70.576	22.795	0.666844	-0.584578	0.4293	0.6785
Ift27	10.859	3.831	6.879	2.222	0.666943	-0.584365	0.6718	0.6836
Cdkn3	5.029	1.774	2.635	0.851	0.667267	-0.583663	1	1
Itga1	2.797	0.987	1.012	0.327	0.667841	-0.582424	1	1
Slc25a39	131.823	46.505	95.154	30.734	0.668014	-0.58205	0.3543	0.6935
Snrpn	8.518	3.005	5.191	1.677	0.668414	-0.581185	1	1
mKIAA1039	124.854	44.047	90.138	29.114	0.668502	-0.580997	0.3498	0.6904
Ttc39a	59.024	20.823	42.087	13.594	0.668744	-0.580474	0.5032	0.8153
2610318N02Rik	3.901	1.376	1.823	0.589	0.668771	-0.580416	1	1
Wbp1	73.456	25.914	52.675	17.014	0.669317	-0.579238	0.4023	0.6609
Arip2	16.865	5.95	11.32	3.656	0.669928	-0.577922	0.7336	1
Amigo3	8.375	2.955	5.116	1.652	0.670544	-0.576597	1	1
AK029023	1.764	0.622	0.274	0.088	0.670777	-0.576095	1	1
1700018L02Rik	18.209	6.424	12.321	3.98	0.670797	-0.576051	0.7336	1
Hexa	43.789	15.448	31.067	10.034	0.670841	-0.575956	0.6199	0.7988
Utp14a	26.833	9.466	18.647	6.023	0.67103	-0.575551	0.5701	0.7706
Mrpl28	57.392	20.247	41.047	13.258	0.671059	-0.575488	0.4949	0.6437
Rab25	115.248	40.658	83.526	26.978	0.671612	-0.574301	0.3452	0.6869
1190003J15Rik	19.157	6.758	13.044	4.213	0.671952	-0.573571	0.5181	0.7373
Aldh6a1	36.774	12.973	25.992	8.395	0.672368	-0.572677	0.4418	0.7859
Erp44	80.709	28.473	58.286	18.826	0.672683	-0.572	0.534	0.828
Arpc5l	48.365	17.062	34.526	11.152	0.672794	-0.571764	0.4774	0.8037
Ccnb1	5.006	1.766	2.666	0.861	0.672813	-0.571723	1	1
MRPL13	64.995	22.929	46.758	15.102	0.672907	-0.57152	0.5107	0.6531
Mlx	30.227	10.664	21.225	6.856	0.673525	-0.570196	0.5815	0.7775
5730455O13Rik	14.443	5.095	9.619	3.107	0.673831	-0.569541	0.7084	1
Ecsit	28.063	9.9	19.676	6.355	0.674771	-0.567531	0.5639	0.7669
1810027O10Rik	76.211	26.886	55.167	17.818	0.674819	-0.567428	0.4097	0.6662
AK003812	3.865	1.364	1.845	0.596	0.675127	-0.566769	1	1
Anapc13	128.591	45.365	93.848	30.312	0.675337	-0.56632	0.3538	0.6923
Camk1d	7.375	2.602	4.437	1.433	0.675458	-0.566062	0.6123	0.6221
Cd302	4.25	1.499	2.129	0.688	0.67547	-0.566036	1	1
Rap1gap2	127.185	44.869	92.843	29.988	0.675576	-0.56581	0.3538	0.6923
Lpl	4.753	1.677	2.505	0.809	0.675756	-0.565425	1	1
3110082I17Rik	27.695	9.77	19.455	6.284	0.676323	-0.564215	0.5639	0.7669
Svip	7.391	2.607	4.459	1.44	0.676462	-0.563918	0.6123	0.6221
Shmt2	76.636	27.036	55.623	17.966	0.676487	-0.563865	0.4097	0.6662
Tmem50b	16.242	5.73	11.001	3.553	0.676523	-0.563789	0.7336	1
Myo5c	52.495	18.519	37.857	12.228	0.677699	-0.561284	0.4861	0.6352
Gm14090	20.3	7.162	14.037	4.534	0.67802	-0.5606	0.7522	1
Ndufa12	60.811	21.453	44.043	14.226	0.678128	-0.560371	0.5032	0.8153
Reg3b	7179.25	2532.74	5318.25	1717.75	0.678347	-0.559906	0.2365	0.6279
Gnptg	37.031	13.064	26.443	8.541	0.678399	-0.559795	0.6096	0.7949
Magt1	68.484	24.16	49.754	16.07	0.678458	-0.559669	0.5169	0.8213
Mknk1	135.538	47.816	99.496	32.136	0.678794	-0.558955	0.3577	0.6952
Dpm3	33.007	11.644	23.507	7.593	0.679611	-0.557219	0.5965	0.7867
Snord53	5.574	1.966	3.147	1.016	0.679703	-0.557023	1	1
Mrpl18	49.425	17.436	35.713	11.535	0.67992	-0.556564	0.637	0.8096
Nr1d2	33.019	11.649	23.546	7.605	0.680291	-0.555776	0.5965	0.7867
D2Ertd750e	20.894	7.371	14.537	4.695	0.680325	-0.555704	0.7522	1
Nat9	20.071	7.081	13.927	4.498	0.680361	-0.555627	0.5181	0.7373
Golph3l	28.466	10.042	20.165	6.513	0.680402	-0.55554	0.7774	1
Rps29	12.533	4.421	8.326	2.689	0.680502	-0.555329	1	1
Tmem14c	64.903	22.897	47.256	15.263	0.680546	-0.555236	0.5107	0.6531
Kcnj13	2.268	0.8	0.697	0.225	0.680556	-0.555215	1	1
H2-Ke2	65.362	23.059	47.598	15.374	0.680577	-0.55517	0.5107	0.6531
Gnpnat1	14.853	5.24	10.053	3.247	0.680609	-0.555102	0.7084	1
Stk39	46.394	16.367	33.587	10.848	0.682213	-0.551705	0.6289	0.8044
Swi5	171.322	60.44	126.701	40.923	0.68234	-0.551436	0.3758	0.706
Mkx	4.752	1.676	2.557	0.826	0.682362	-0.551391	1	1
AK034716	21.561	7.606	15.094	4.875	0.682663	-0.550754	0.5469	0.7558
Snora30	2.682	0.946	1.019	0.329	0.682939	-0.550171	1	1
Cdca3	36.955	13.037	26.605	8.593	0.683408	-0.549181	0.6096	0.7949
Hmbs	24.594	8.676	17.379	5.613	0.683444	-0.549106	0.5701	0.7706
Znhit3	20.224	7.135	14.122	4.561	0.683589	-0.548798	0.7522	1
2900010M23Rik	49.175	17.348	35.746	11.546	0.68378	-0.548395	0.637	0.8096
Lap3	112.979	39.857	83.4	26.938	0.6838	-0.548355	0.4437	0.6881
Arhgap24	14.138	4.988	9.582	3.095	0.683868	-0.548211	0.7084	1
mKIAA0452	15.623	5.512	10.704	3.457	0.684429	-0.547028	0.4808	0.7137
Rab3a	7.19	2.537	4.4	1.421	0.684478	-0.546923	0.6123	0.6221
Mrps26	51.331	18.109	37.416	12.085	0.684756	-0.546338	0.4884	0.808
Arhgap10	8.157	2.878	5.128	1.656	0.684889	-0.546058	1	1
Polr2e	150.711	53.169	112.09	36.204	0.686813	-0.54201	0.3676	0.7009
Dci	62.312	21.983	45.815	14.798	0.687378	-0.540825	0.511	0.8184
Lyplal1	13.614	4.803	9.253	2.989	0.687403	-0.540772	0.7084	1
Cd38	12.905	4.553	8.729	2.819	0.687736	-0.540072	0.7084	1
Prom1	160.949	56.78	119.953	38.744	0.68785	-0.539833	0.3732	0.7043
Apobec1	7.258	2.561	4.489	1.45	0.688009	-0.539501	0.6123	0.6221
1810014F10Rik	28.509	10.058	20.466	6.61	0.68819	-0.539122	0.7774	1
AK215237	27.957	9.863	20.061	6.48	0.688576	-0.538312	0.5639	0.7669
Fam108a	58.768	20.733	43.254	13.971	0.68886	-0.537717	0.5032	0.8153
Mest	54.811	19.337	40.284	13.011	0.688941	-0.537547	0.4985	0.8121
Nipal4	2.122	0.749	0.636	0.205	0.688965	-0.537497	1	1
2310007F21Rik	34.647	12.223	25.113	8.111	0.689027	-0.537368	0.5965	0.7867
Plxnd1	77.243	27.25	57.189	18.472	0.689274	-0.53685	0.4097	0.6662
Rwdd1	13.457	4.747	9.172	2.962	0.689403	-0.53658	0.7084	1
Slc46a3	2.377	0.839	0.833	0.269	0.690049	-0.535229	1	1
Fpgs	37.521	13.237	27.324	8.825	0.690103	-0.535116	0.6096	0.7949
Slc6a4	16.024	5.653	11.121	3.592	0.690215	-0.534882	0.7336	1
Gstz1	38.556	13.602	28.128	9.085	0.690659	-0.533955	0.4584	0.7926
Prpsap1	88.862	31.349	66.093	21.347	0.69081	-0.53364	0.4237	0.6762
Bscl2	40.001	14.112	29.231	9.441	0.690908	-0.533435	0.4584	0.7926
AK217047	29.114	10.271	21.038	6.795	0.691598	-0.531995	0.7774	1
Daf2	1.665	0.587	0.302	0.098	0.691871	-0.531424	1	1
Snora33	3.152	1.112	1.429	0.462	0.692235	-0.530667	1	1
Uqcrb	61.908	21.84	45.857	14.811	0.69225	-0.530634	0.511	0.8184
Bcl2l14	7.098	2.504	4.414	1.426	0.692352	-0.530423	0.6123	0.6221
Ak7	3.919	1.383	2.017	0.651	0.692824	-0.529439	1	1
Adhfe1	5.261	1.856	3.031	0.979	0.692927	-0.529224	1	1
Slc9a4	1.653	0.583	0.3	0.097	0.692988	-0.529098	1	1
Zfp61	5.157	1.819	2.954	0.954	0.693154	-0.528753	1	1
Xylb	7.044	2.485	4.384	1.416	0.693257	-0.528538	1	1
TRAD/RAD51L3	7.842	2.767	4.991	1.612	0.69339	-0.528261	1	1
AK085337	5.902	2.082	3.522	1.138	0.693705	-0.527605	1	1
Gas5	405.039	142.892	306.225	98.908	0.694326	-0.526314	0.3353	0.7294
Nipal2	18.883	6.662	13.376	4.32	0.694336	-0.526295	0.5181	0.7373
Cst3	446.013	157.347	337.571	109.033	0.694885	-0.525153	0.3384	0.7311
Slc25a23	28.012	9.882	20.32	6.563	0.695001	-0.524913	0.7774	1
Pde8b	5.115	1.804	2.939	0.949	0.695078	-0.524752	1	1
Taldo1	154.415	54.475	116.287	37.56	0.695088	-0.524733	0.4705	0.7059
Slc1a5	115.564	40.769	86.809	28.039	0.695229	-0.524441	0.447	0.6908
Cytip	4.426	1.561	2.419	0.781	0.695431	-0.52402	1	1
Mzt2	26.529	9.359	19.207	6.204	0.695434	-0.524015	0.5701	0.7706
Rps8	166.707	58.812	125.747	40.615	0.695763	-0.523331	0.3786	0.7072
Mrpl30	78.094	27.55	58.425	18.871	0.696007	-0.522826	0.534	0.828
Naip6	4.272	1.507	2.308	0.745	0.696051	-0.522735	1	1
Gria3	2.984	1.053	1.329	0.429	0.696055	-0.522728	1	1
Eef1d	89.49	31.571	67.164	21.693	0.696724	-0.521341	0.4294	0.8331
Rcan2	28.039	9.892	20.4	6.589	0.69675	-0.521287	0.7774	1
BC017158	33.042	11.657	24.21	7.82	0.696848	-0.521085	0.5965	0.7867
P2ry14	7.39	2.607	4.686	1.514	0.696978	-0.520815	1	1
Pxmp4	28.143	9.928	20.496	6.62	0.697291	-0.520166	0.7774	1
Ldha	271.166	95.663	205.657	66.426	0.697537	-0.519659	0.3212	0.7206
6430573F11Rik	2.826	0.997	1.217	0.393	0.697546	-0.519639	1	1
Dck	10.729	3.785	7.239	2.338	0.697597	-0.519535	0.6718	0.6836
Chrm3	14.287	5.04	9.952	3.214	0.697682	-0.519358	0.7084	1
Snora34	4.508	1.59	2.5	0.807	0.697683	-0.519356	1	1
AK178429	34.825	12.286	25.603	8.27	0.697727	-0.519266	0.5965	0.7867
Mro	1.715	0.605	0.37	0.12	0.697819	-0.519075	1	1
Hdac11	91.818	32.392	69.157	22.337	0.69888	-0.516883	0.4294	0.8331
Cyp7b1	2.306	0.814	0.831	0.268	0.699008	-0.51662	1	1
Acpp	5.981	2.11	3.636	1.174	0.699035	-0.516563	1	1
Gatc	21.958	7.746	15.84	5.116	0.699291	-0.516035	0.5469	0.7558
Rad51l3	7.849	2.769	5.064	1.636	0.69939	-0.515831	1	1
Psmg3	22.932	8.09	16.592	5.359	0.69956	-0.51548	0.5469	0.7558
Slc25a16	13.627	4.807	9.484	3.063	0.699673	-0.515248	0.7084	1
Tinag	33.287	11.743	24.516	7.918	0.699835	-0.514913	0.5965	0.7867
2610029I01Rik	2.408	0.85	0.914	0.295	0.7	-0.514573	1	1
Mrps34	50.876	17.948	37.97	12.264	0.700021	-0.51453	0.4884	0.808
Tubd1	4.71	1.662	2.675	0.864	0.700225	-0.514109	1	1
Acadsb	35.009	12.351	25.851	8.35	0.700322	-0.51391	0.5965	0.7867
Abce1	63.145	22.277	47.42	15.316	0.700949	-0.512618	0.511	0.8184
Alg3	25.17	8.88	18.349	5.927	0.701113	-0.51228	0.5701	0.7706
Dgcr6	16.944	5.978	12.055	3.894	0.701347	-0.511799	0.7336	1
Slc48a1	33.971	11.984	25.107	8.109	0.701556	-0.51137	0.5965	0.7867
Mrps14	24.757	8.734	18.058	5.833	0.701972	-0.510514	0.5701	0.7706
Car9	87.856	30.994	66.464	21.467	0.702225	-0.509994	0.4237	0.6762
Mir698	1.202	0.424	0	0	0.702247	-0.509949	1	1
Preb	49.858	17.589	37.344	12.062	0.702674	-0.509073	0.4884	0.808
AK013506	2.713	0.957	1.163	0.376	0.703117	-0.508163	1	1
Eef1b2	665.328	234.718	510.094	164.756	0.703196	-0.508001	0.3499	0.737
2900010J23Rik	172.952	61.015	131.923	42.61	0.703217	-0.507958	0.4788	0.7101
DAPK2	1.789	0.631	0.455	0.147	0.70325	-0.507891	1	1
1700007K13Rik	1.918	0.677	0.557	0.18	0.703637	-0.507096	1	1
Ptn	4.415	1.558	2.478	0.8	0.703675	-0.507019	1	1
Stard7	31.165	10.995	23.051	7.445	0.704043	-0.506264	0.5815	0.7775
Slc35a3	19.379	6.837	13.997	4.521	0.704479	-0.505372	0.7522	1
Pomgnt1	46.287	16.329	34.705	11.209	0.704542	-0.505243	0.6289	0.8044
Tmco1	20.723	7.311	15.035	4.856	0.704608	-0.505107	0.7522	1
Dnajc25	15.942	5.624	11.361	3.67	0.705012	-0.50428	0.7336	1
Cnp	63.484	22.396	47.982	15.498	0.705163	-0.503971	0.511	0.8184
Msrb2	10.575	3.731	7.239	2.338	0.705559	-0.503161	0.6718	0.6836
Lmf1	15.613	5.508	11.127	3.594	0.7059	-0.502463	0.7336	1
Eif5a	416.02	146.766	319.88	103.319	0.705974	-0.502312	0.3386	0.7304
TAPL	3.466	1.223	1.765	0.57	0.706253	-0.501743	1	1
mKIAA1148	14.199	5.009	10.046	3.245	0.70644	-0.50136	0.7084	1
Barx2	1.842	0.65	0.513	0.166	0.706667	-0.500898	1	1
Chpt1	17.123	6.041	12.329	3.982	0.70757	-0.499055	0.7336	1
Sf4	16.924	5.971	12.178	3.933	0.707646	-0.4989	0.7336	1
Cox16	32.295	11.393	24.058	7.771	0.707738	-0.498712	0.7861	1
Mars	83.884	29.593	63.949	20.655	0.707842	-0.498501	0.5426	0.8315
Srp72	105.368	37.172	80.571	26.024	0.707953	-0.498274	0.4445	0.8383
AK158482	2.154	0.76	0.763	0.246	0.707955	-0.498271	1	1
Kiaa1456	2.661	0.939	1.156	0.373	0.708097	-0.497981	1	1
Snord45c	5.279	1.862	3.18	1.027	0.708246	-0.497678	1	1
Chrdl2	1.334	0.471	0.131	0.042	0.708362	-0.497442	1	1
Tmed2	27.179	9.588	20.133	6.503	0.708632	-0.496891	0.7774	1
Slc39a8	66.482	23.454	50.588	16.34	0.709086	-0.495967	0.5183	0.8213
Gm6642	9.727	3.432	6.636	2.143	0.709161	-0.495816	1	1
Coq2	14.747	5.203	10.532	3.402	0.709657	-0.494807	0.7084	1
Lipc	3.404	1.201	1.74	0.562	0.709677	-0.494765	1	1
Cep78	12.035	4.246	8.43	2.723	0.709684	-0.494752	1	1
Chchd6	10.04	3.542	6.886	2.224	0.709819	-0.494476	0.6718	0.6836
Mir140	1.271	0.448	0.086	0.028	0.709945	-0.494221	1	1
Aimp1	106.034	37.407	81.33	26.269	0.710001	-0.494107	0.4445	0.8383
Nckap5	2.103	0.742	0.733	0.237	0.710103	-0.493899	1	1
Bccip	76.68	27.052	58.577	18.92	0.71011	-0.493886	0.534	0.828
AK077350	1.772	0.625	0.477	0.154	0.710154	-0.493796	1	1
Defa6	2.384	0.841	0.955	0.308	0.710483	-0.493127	1	1
Gstm4	10.089	3.559	6.934	2.24	0.710682	-0.492724	0.6718	0.6836
AK136654	2.537	0.895	1.074	0.347	0.710818	-0.492448	1	1
Zfp791	2.749	0.97	1.24	0.401	0.711168	-0.491739	1	1
Polr3gl	20.191	7.123	14.791	4.777	0.71119	-0.491692	0.7522	1
Eif4ebp1	103.899	36.654	79.972	25.83	0.712541	-0.488956	0.4445	0.8383
Srpr	191.649	67.611	148.294	47.898	0.712685	-0.488664	0.3893	0.7136
Chchd10	34.462	12.158	25.955	8.383	0.713102	-0.487819	0.5965	0.7867
2011-09-15	290.744	102.57	225.62	72.873	0.713266	-0.487487	0.4083	0.7246
Fabp2	1.24	0.437	0.078	0.025	0.713292	-0.487436	1	1
Timm9	14.838	5.235	10.675	3.448	0.713392	-0.487233	0.7084	1
Msra	16.338	5.764	11.846	3.826	0.713483	-0.487049	0.7336	1
Prss16	3.241	1.143	1.642	0.53	0.713952	-0.4861	1	1
Ufc1	152.971	53.966	118.467	38.264	0.714332	-0.485332	0.4705	0.7059
Rab3il1	3.062	1.08	1.504	0.486	0.714423	-0.485149	1	1
Sypl	76.683	27.053	58.987	19.052	0.71479	-0.484409	0.534	0.828
Ttc39b	6.887	2.43	4.494	1.452	0.714869	-0.48425	1	1
Timm17b	26.974	9.516	20.18	6.518	0.714911	-0.484165	0.7774	1
Trim50	5.74	2.025	3.601	1.163	0.715041	-0.483901	1	1
AK187054	1271.69	448.634	992.36	320.524	0.715079	-0.483825	0.3626	0.7431
Pold2	62.287	21.974	47.775	15.431	0.7152	-0.483582	0.511	0.8184
Ccbl1	21.959	7.747	16.274	5.256	0.715217	-0.483548	0.5469	0.7558
2810002N01Rik	20.617	7.273	15.223	4.917	0.715218	-0.483545	0.7522	1
2210411K11Rik	24.223	8.546	18.047	5.829	0.715378	-0.483222	0.5701	0.7706
Naprt1	43.008	15.173	32.742	10.575	0.715699	-0.482575	0.6311	1
Denr	55.809	19.689	42.759	13.811	0.715888	-0.482195	0.5079	0.8159
Slc25a29	4.022	1.419	2.266	0.732	0.715998	-0.481972	1	1
Calcrl	2.671	0.942	1.211	0.391	0.716272	-0.481421	1	1
Tmem126a	36.671	12.937	27.815	8.984	0.716367	-0.48123	0.6096	0.7949
Aldh7a1	112.032	39.523	86.822	28.043	0.716704	-0.48055	0.449	0.8405
AK030918	37.163	13.111	28.236	9.12	0.717171	-0.479611	0.6096	0.7949
Eif1ax	80.906	28.542	62.553	20.204	0.717758	-0.478431	0.5383	0.8297
Vsig1	6.102	2.153	3.914	1.264	0.718046	-0.477851	1	1
Slc39a7	162.645	57.379	126.695	40.921	0.718084	-0.477776	0.4765	0.8498
Rpl31	14.832	5.233	10.768	3.478	0.718434	-0.477072	0.7084	1
Rtn4ip1	6.239	2.201	4.024	1.3	0.718525	-0.476889	1	1
Aldh4a1	22.379	7.895	16.695	5.392	0.718606	-0.476727	0.5469	0.7558
Nat15	23.356	8.24	17.469	5.642	0.718831	-0.476275	0.7666	1
Rpl8	2158.79	761.59	1694.1	547.18	0.71884	-0.476258	0.3679	0.7457
Gne	11.886	4.193	8.467	2.735	0.719237	-0.47546	1	1
Tanc2	7.52	2.653	5.041	1.628	0.719409	-0.475116	1	1
Cux1	40.208	14.185	30.758	9.935	0.720119	-0.473694	0.621	1
Rhbdd1	21.706	7.658	16.208	5.235	0.720143	-0.473644	0.5469	0.7558
Lonrf2	2.09	0.737	0.778	0.251	0.720207	-0.473516	1	1
AK018014	3.269	1.153	1.707	0.551	0.72039	-0.47315	1	1
Surf4	254.177	89.67	199.31	64.375	0.721021	-0.471886	0.4032	0.722
Cinp	25.101	8.855	18.918	6.11	0.721461	-0.471006	0.5701	0.7706
Fam151a	4.605	1.625	2.768	0.894	0.721524	-0.470881	1	1
1810009A15Rik	35.481	12.517	27.128	8.762	0.722202	-0.469526	0.6096	0.7949
Mei4	1.189	0.419	0.076	0.025	0.72234	-0.469251	1	1
Rab41	26.415	9.319	19.982	6.454	0.722357	-0.469216	0.5701	0.7706
Chdh	17.217	6.074	12.724	4.11	0.722364	-0.469203	0.7336	1
Slc16a7	5.795	2.044	3.711	1.199	0.722405	-0.469121	1	1
Atp5h	50.355	17.765	38.875	12.556	0.722409	-0.469113	0.6443	0.8144
Banf1	162.276	57.249	127.231	41.095	0.722673	-0.468584	0.4765	0.8498
6030429G01Rik	5.159	1.82	3.213	1.038	0.722695	-0.468541	1	1
Rpl7	310.369	109.494	244.148	78.858	0.722736	-0.468459	0.4143	0.7286
Timp4	1.623	0.573	0.428	0.138	0.723458	-0.467018	1	1
Tmem220	2.565	0.905	1.174	0.379	0.723885	-0.466169	1	1
Aurkaip1	103.908	36.657	81.359	26.278	0.724381	-0.46518	0.4445	0.8383
Jtb	65.674	23.169	51.134	16.516	0.72473	-0.464484	0.6667	1
Slc25a10	41.755	14.731	32.207	10.403	0.724874	-0.464197	0.6199	0.7988
Ivd	47.997	16.933	37.157	12.001	0.724976	-0.463994	0.637	0.8096
Crlf1	6.623	2.336	4.394	1.419	0.72512	-0.463709	1	1
1110049F12Rik	33.981	11.988	26.068	8.42	0.725285	-0.46338	0.5965	0.7867
Lsm4	141.773	50.015	111.485	36.009	0.725453	-0.463045	0.4688	0.847
Dpf1	1.764	0.622	0.548	0.177	0.725647	-0.462659	1	1
Sec61a1	301.156	106.243	237.937	76.852	0.72594	-0.462077	0.4139	0.7284
Zfp932	3.375	1.191	1.83	0.591	0.726152	-0.461656	1	1
AK194371	117.9	41.593	92.673	29.933	0.726246	-0.46147	0.4564	0.8424
Kit	18.698	6.596	13.99	4.519	0.726567	-0.460833	0.7522	1
Nme1	212.377	74.924	167.759	54.185	0.726845	-0.46028	0.4924	0.855
Scfd1	40.008	14.114	30.936	9.992	0.727273	-0.459432	0.621	1
Nramp2	44.79	15.801	34.748	11.223	0.727516	-0.458949	0.6289	0.8044
Coasy	38.154	13.46	29.479	9.521	0.727593	-0.458796	0.7999	1
Rnh1	352.41	124.325	279.24	90.192	0.727644	-0.458695	0.4189	0.7311
Tmem109	65.189	22.998	50.968	16.462	0.727644	-0.458695	0.5183	0.8213
Tomm6	94.992	33.512	74.724	24.135	0.728297	-0.4574	0.5541	0.8359
Gm4535	1.452	0.512	0.316	0.102	0.728836	-0.456334	1	1
Cdk1	26.46	9.335	20.226	6.533	0.728882	-0.456242	0.7782	1
Nudt16	3.9	1.376	2.266	0.732	0.728956	-0.456096	1	1
Hdlbp	392.656	138.523	311.817	100.714	0.729012	-0.455985	0.4228	0.7331
Prkaa2	3.148	1.111	1.67	0.539	0.729038	-0.455933	1	1
Cox5a	188.305	66.431	149.355	48.24	0.730228	-0.453581	0.4864	0.853
AK160548	35.765	12.617	27.691	8.944	0.730264	-0.453511	0.6096	0.7949
Lsmd1	42.597	15.028	33.144	10.705	0.730285	-0.453469	0.6311	1
Rpl6	155.78	54.957	123.436	39.869	0.730364	-0.453312	0.4762	0.8494
Zfp810	8.467	2.987	5.92	1.912	0.730374	-0.453293	1	1
Gm16379	7.102	2.505	4.83	1.56	0.730385	-0.453271	1	1
Acsm3	3.625	1.279	2.058	0.665	0.730584	-0.452879	1	1
Nat8	1.18	0.416	0.107	0.035	0.730932	-0.45219	1	1
Mocs2	25.416	8.966	19.461	6.286	0.731086	-0.451888	0.5701	0.7706
Dnajc15	35.444	12.504	27.478	8.875	0.731265	-0.451534	0.6096	0.7949
Ndufa8	111.418	39.307	88.173	28.479	0.731362	-0.451343	0.5662	0.8406
Scml4	12.432	4.386	9.103	2.94	0.731526	-0.451019	1	1
Cyp2c68	1.36	0.48	0.256	0.083	0.731757	-0.450564	1	1
Cacna1a	2.482	0.876	1.155	0.373	0.731876	-0.450328	1	1
Xrcc6bp1	2.699	0.952	1.329	0.429	0.73207	-0.449947	1	1
Fundc1	30.893	10.899	23.883	7.714	0.73233	-0.449433	0.7861	1
Stx19	3.746	1.322	2.169	0.701	0.732558	-0.448985	1	1
Taco1	10.936	3.858	7.924	2.559	0.732606	-0.448891	1	1
Nptx2	26.933	9.502	20.724	6.694	0.732622	-0.448858	0.7774	1
Atp5o	171.272	60.422	136.315	44.029	0.733109	-0.447901	0.4825	0.8515
G0s2	1.542	0.544	0.409	0.132	0.733161	-0.447799	1	1
AK211473	75.698	26.705	59.811	19.318	0.733369	-0.447388	0.534	0.828
Sdhaf1	15.694	5.537	11.753	3.796	0.73367	-0.446797	0.7336	1
Tcf19	18.906	6.67	14.327	4.628	0.733768	-0.446604	0.7522	1
Cox6b1	317.998	112.185	254.204	82.106	0.734249	-0.445658	0.4175	0.8609
Psmb10	124.912	44.067	99.448	32.121	0.734928	-0.444325	0.5758	0.8444
Mrgpre	1.968	0.694	0.758	0.245	0.734947	-0.444288	1	1
Tac1	1.711	0.604	0.555	0.179	0.735037	-0.44411	1	1
Slc25a12	14.23	5.02	10.607	3.426	0.735216	-0.44376	0.7084	1
Cmtm7	26.81	9.458	20.719	6.692	0.735513	-0.443176	0.7782	1
Bcs1l	20.016	7.061	15.259	4.929	0.735517	-0.44317	0.7522	1
Acad8	32.344	11.41	25.165	8.128	0.735536	-0.443132	0.7861	1
Gtf2h5	38.158	13.462	29.847	9.64	0.735721	-0.442769	0.7999	1
Tyms	25.519	9.003	19.709	6.366	0.736379	-0.441479	0.5701	0.7706
Fam92a	14.06	4.96	10.493	3.389	0.736409	-0.44142	0.7084	1
Larp1	126.85	44.751	101.233	32.697	0.73653	-0.441183	0.5778	0.8454
Mrpl11	15.616	5.509	11.757	3.797	0.73698	-0.440303	0.7336	1
Nmral1	32.297	11.394	25.187	8.135	0.73705	-0.440165	0.7861	1
AK009724	3.849	1.358	2.285	0.738	0.737065	-0.440136	1	1
Got1	32.842	11.586	25.639	8.281	0.737407	-0.439468	0.5965	0.7867
Snord1a	1.237	0.436	0.184	0.059	0.737465	-0.439353	1	1
Gstm3	1.987	0.701	0.791	0.255	0.737801	-0.438696	1	1
Sardh	40.652	14.341	31.948	10.319	0.737827	-0.438646	0.621	1
Scrn3	7.074	2.496	4.891	1.58	0.737986	-0.438334	1	1
Sdhc	109.633	38.677	87.57	28.284	0.73806	-0.43819	0.5662	0.8406
Rpn1	165.542	58.401	132.689	42.857	0.738321	-0.43768	0.483	0.8514
Npm1	361.792	127.635	290.983	93.985	0.738407	-0.437512	0.4223	0.8624
2810428I15Rik	41.592	14.673	32.741	10.575	0.738531	-0.437269	0.6311	1
DQ569435	1	0.353	0	0	0.739098	-0.436162	1	1
DQ564920	1	0.353	0	0	0.739098	-0.436162	1	1
Ndufa2	159.985	56.44	128.352	41.457	0.739154	-0.436053	0.4785	0.8501
Trappc1	48.07	16.958	38.004	12.275	0.739225	-0.435915	0.637	0.8096
Atp5e	309.87	109.318	249.428	80.563	0.739344	-0.435681	0.5119	0.861
Snora65	6.737	2.377	4.636	1.497	0.739414	-0.435546	1	1
Mrpl15	18.529	6.537	14.165	4.575	0.739684	-0.435019	0.7522	1
Alg14	20.57	7.257	15.822	5.11	0.739978	-0.434445	0.7522	1
Tmem134	42.51	14.997	33.555	10.838	0.740014	-0.434376	0.6311	1
Hspe1	101.076	35.658	80.905	26.132	0.740139	-0.434133	0.5604	0.8387
AK018990	1.302	0.459	0.249	0.08	0.740233	-0.433949	1	1
Ublcp1	4.193	1.479	2.589	0.836	0.740621	-0.433192	1	1
Tex261	48.608	17.148	38.517	12.441	0.740633	-0.43317	0.637	0.8096
C4b	81.923	28.901	65.473	21.147	0.740678	-0.433082	0.5441	0.8323
Sdr42e1	4.48	1.58	2.821	0.911	0.740698	-0.433043	1	1
A430005L14Rik	20.587	7.263	15.86	5.123	0.741014	-0.432427	0.7522	1
Slc5a2	8.657	3.054	6.207	2.005	0.741243	-0.431981	1	1
Tmem205	64.378	22.712	51.326	16.578	0.741312	-0.431846	0.6667	1
1700112E06Rik	1.692	0.597	0.57	0.184	0.74139	-0.431695	1	1
Ndufv3	64.418	22.726	51.371	16.592	0.741465	-0.431549	0.6667	1
Rnf145	5.873	2.072	3.961	1.279	0.741862	-0.430777	1	1
Hagh	58.086	20.492	46.298	14.954	0.742323	-0.429882	0.6573	1
AK007770	6.287	2.218	4.303	1.39	0.742697	-0.429154	1	1
Inpp1	30.367	10.713	23.839	7.7	0.742764	-0.429023	0.7861	1
mGpi1	43.988	15.518	34.894	11.27	0.742826	-0.428904	0.6289	0.8044
Nbas	22.285	7.862	17.285	5.583	0.742835	-0.428887	0.7666	1
Ppp3ca	69.114	24.382	55.298	17.861	0.743086	-0.4284	0.671	1
1110065P20Rik	38.318	13.518	30.335	9.798	0.743766	-0.427079	0.621	1
Ahcy	11.911	4.202	8.887	2.87	0.743945	-0.426733	1	1
Fam129a	87.316	30.804	70.166	22.663	0.744026	-0.426575	0.5533	0.8363
Niban	98.109	34.611	78.974	25.508	0.744377	-0.425895	0.562	0.8399
Uqcr10	134.134	47.321	108.268	34.97	0.744397	-0.425856	0.5818	0.8474
Rab38	2.377	0.839	1.141	0.369	0.744426	-0.425799	1	1
Mir1968	0.971	0.343	0	0	0.744602	-0.425459	1	1
Snrpd3	239.454	84.476	194.063	62.681	0.745016	-0.424656	0.5025	0.8581
Pcx	49.112	17.326	39.193	12.659	0.745334	-0.42404	0.6482	1
Tmem120b	8.453	2.982	6.096	1.969	0.745605	-0.423516	1	1
AK087725	2.193	0.774	1.001	0.323	0.745772	-0.423193	1	1
AK177731	9.399	3.316	6.884	2.223	0.746756	-0.421291	1	1
Lyrm5	16.099	5.679	12.346	3.988	0.746818	-0.421171	0.7336	1
AB349855	0.962	0.339	0	0	0.746826	-0.421156	1	1
Kdelr1	187.296	66.075	152.031	49.105	0.747	-0.420821	0.4897	0.8538
mKIAA1630	1.628	0.574	0.544	0.176	0.747141	-0.420547	1	1
AK079377	1.235	0.436	0.227	0.073	0.747214	-0.420406	1	1
Hnf1a	19.222	6.781	14.912	4.816	0.747462	-0.419928	0.7522	1
Phf7	4.684	1.652	3.042	0.983	0.747738	-0.419396	1	1
Mrps23	49.768	17.557	39.88	12.881	0.74802	-0.418852	0.6443	0.8144
Tbkbp1	3.963	1.398	2.458	0.794	0.748123	-0.418652	1	1
Snora47	1.949	0.688	0.815	0.263	0.748223	-0.41846	1	1
Tmem214	124.053	43.764	100.772	32.549	0.749464	-0.416069	0.5783	0.8464
Rfc5	13.475	4.754	10.256	3.313	0.749566	-0.415874	0.7084	1
Pole3	67.869	23.943	54.795	17.698	0.749629	-0.415751	0.671	1
Pus7	20.37	7.186	15.916	5.141	0.750183	-0.414685	0.7522	1
Mir3112	3.354	1.183	1.976	0.638	0.750344	-0.414377	1	1
Thap2	12.649	4.462	9.594	3.099	0.750458	-0.414157	1	1
Zdhhc4	16.616	5.862	12.848	4.15	0.75051	-0.414057	0.7336	1
Spcs1	107.553	37.943	87.405	28.231	0.75061	-0.413865	0.5665	0.8415
Ndufa10	110.824	39.097	90.136	29.113	0.751004	-0.413108	0.5694	0.8428
Ctsc	31.125	10.98	24.773	8.001	0.751336	-0.412471	0.7861	1
Setbp1	3.485	1.229	2.089	0.675	0.751458	-0.412236	1	1
Mrpl16	40.534	14.3	32.503	10.498	0.751503	-0.412149	0.621	1
Tomm40l	18.458	6.512	14.384	4.646	0.751597	-0.411968	0.7522	1
Agpat5	11.136	3.929	8.375	2.705	0.751674	-0.411821	1	1
Fen1	41.644	14.691	33.425	10.796	0.751769	-0.41164	0.6311	1
Hemk1	7.583	2.675	5.459	1.763	0.751837	-0.411509	1	1
Rfc4	32.639	11.515	26.037	8.41	0.751898	-0.411392	0.5965	0.7867
2610018G03Rik	4.478	1.58	2.914	0.941	0.752326	-0.410571	1	1
Pkm2	190.619	67.248	155.883	50.349	0.752388	-0.410451	0.4915	0.8544
BC050140	1.804	0.636	0.716	0.231	0.752445	-0.410342	1	1
Gm129	4.647	1.639	3.054	0.986	0.752558	-0.410126	1	1
Alb	6.188	2.183	4.322	1.396	0.752749	-0.409759	1	1
Ccna2	43.296	15.274	34.833	11.251	0.752796	-0.409669	0.6311	1
Psmd6	124.262	43.838	101.415	32.756	0.752844	-0.409578	0.5783	0.8464
Fam190a	5.175	1.826	3.493	1.128	0.753008	-0.409263	1	1
A930005H10Rik	7.061	2.491	5.043	1.629	0.753079	-0.409126	1	1
Slc33a1	24.544	8.659	19.436	6.278	0.753494	-0.408332	0.5701	0.7706
Npal2	14.787	5.217	11.411	3.686	0.75374	-0.407862	1	1
Gsto1	212.475	74.958	174.222	56.272	0.753996	-0.407372	0.4968	0.8562
Vegfb	20.651	7.285	16.244	5.247	0.754013	-0.407338	0.7522	1
Cpa1	6439.91	2271.91	5303.47	1712.98	0.75409	-0.407191	0.4598	0.8729
Mccc1	20.831	7.349	16.4	5.297	0.754222	-0.406939	0.7522	1
Cnr1	1.682	0.593	0.626	0.202	0.754551	-0.406309	1	1
Mrps15	43.862	15.474	35.392	11.431	0.754583	-0.406249	0.6311	1
Gpatch4	35.372	12.479	28.408	9.176	0.754952	-0.405543	0.7935	1
AK018427	1.69	0.596	0.634	0.205	0.755013	-0.405428	1	1
Gtf2a2	30.795	10.864	24.642	7.959	0.755142	-0.405181	0.7861	1
Herpud1	443.238	156.368	364.88	117.853	0.755255	-0.404964	0.5252	0.8652
Yars	56.337	19.875	45.72	14.767	0.755305	-0.404868	0.6573	1
Fam69b	4.757	1.678	3.168	1.023	0.755414	-0.40466	1	1
Klk1b1	1.202	0.424	0.236	0.076	0.755618	-0.404271	1	1
2610015P09Rik	8.964	3.162	6.642	2.145	0.755646	-0.404217	1	1
Znhit2-ps	15.511	5.472	12.046	3.891	0.755717	-0.404082	1	1
Ung	22.819	8.05	18.08	5.84	0.755801	-0.403921	0.7666	1
Lars	88.415	31.192	72.254	23.337	0.755995	-0.403551	0.5533	0.8363
Ano1	58.868	20.768	47.86	15.458	0.756064	-0.40342	0.657	0.8196
Ap3s1	15.246	5.379	11.836	3.823	0.756075	-0.403399	1	1
DQ549471	16.968	5.986	13.258	4.282	0.756084	-0.403382	0.7336	1
Tmem162	8.805	3.106	6.518	2.105	0.75621	-0.40314	1	1
Ndufv2	63.718	22.479	51.898	16.763	0.756548	-0.402496	0.6683	1
Yipf1	31.317	11.048	25.125	8.115	0.756557	-0.402479	0.7861	1
Rab43	21.005	7.41	16.603	5.363	0.756599	-0.402399	0.7522	1
Trit1	21.993	7.759	17.444	5.634	0.757392	-0.400887	0.7666	1
4930481A15Rik	5.243	1.85	3.591	1.16	0.757895	-0.399931	1	1
Arfip2	56.495	19.931	46.019	14.864	0.757919	-0.399885	0.6573	1
Dnajc6	1.383	0.488	0.396	0.128	0.758065	-0.399607	1	1
Atp5j	240.438	84.823	198.387	64.077	0.75827	-0.399217	0.5037	0.8585
1810022C23Rik	4.324	1.525	2.834	0.915	0.758416	-0.398939	1	1
AK011444	5.032	1.775	3.422	1.105	0.758559	-0.398668	1	1
2810026P18Rik	74.277	26.204	60.793	19.636	0.758565	-0.398655	0.6791	1
2010107G23Rik	11.53	4.068	8.813	2.847	0.759077	-0.397683	1	1
Gm12298	0.973	0.343	0.061	0.02	0.759494	-0.39689	1	1
Eif2b1	54.228	19.131	44.25	14.292	0.759624	-0.396642	0.6511	1
Tmem190	2.496	0.881	1.327	0.429	0.759702	-0.396494	1	1
Chac1	70.087	24.726	57.416	18.545	0.759737	-0.396428	0.6752	1
Eif2b3	19.087	6.734	15.1	4.877	0.759891	-0.396135	0.7522	1
Loxl3	5.586	1.971	3.895	1.258	0.760013	-0.395903	1	1
OSCP1	5.696	2.009	3.984	1.287	0.760053	-0.395828	1	1
2010001M06Rik	4.901	1.729	3.332	1.076	0.760718	-0.394566	1	1
Mrpl36	38.869	13.712	31.555	10.192	0.76074	-0.394526	0.621	1
Uprt	16.066	5.668	12.612	4.074	0.760948	-0.394131	0.7336	1
Sf3b5	89.158	31.454	73.373	23.699	0.761046	-0.393944	0.691	1
Sugp1	38.516	13.588	31.29	10.106	0.761311	-0.393443	0.621	1
Fam187b	3.949	1.393	2.544	0.822	0.761387	-0.393297	1	1
Tppp	5.883	2.075	4.154	1.342	0.761626	-0.392845	1	1
AK010129	0.954	0.337	0.06	0.019	0.762154	-0.391845	1	1
Tcte2	3.795	1.339	2.423	0.783	0.762292	-0.391585	1	1
Rps7	126.891	44.765	104.919	33.888	0.762329	-0.391514	0.5807	0.8475
Rassf6	8.537	3.012	6.376	2.059	0.762463	-0.391261	1	1
AK211096	34.239	12.079	27.787	8.975	0.762673	-0.390863	0.7935	1
Eif1b	34.608	12.209	28.127	9.085	0.763495	-0.38931	0.7935	1
Ndufb3	62.782	22.149	51.632	16.677	0.763618	-0.389076	0.6683	1
Tysnd1	24.758	8.734	19.92	6.434	0.763715	-0.388894	0.5701	0.7706
Tcea1	10.308	3.637	7.87	2.542	0.763856	-0.388628	1	1
Sfxn1	54.508	19.23	44.746	14.453	0.763866	-0.388609	0.6511	1
Pdzd11	30.955	10.92	25.11	8.11	0.764262	-0.387861	0.7861	1
Rpl13	34.337	12.114	27.945	9.026	0.764526	-0.387362	0.7935	1
A630095E13Rik	1.231	0.434	0.299	0.097	0.764993	-0.386481	1	1
Rps12	15.606	5.506	12.319	3.979	0.765294	-0.385915	0.7336	1
Ndufb4	4.454	1.571	2.998	0.968	0.765461	-0.385599	1	1
Mcca	18.284	6.45	14.561	4.703	0.765503	-0.385519	1	1
Zfp454	1.422	0.502	0.464	0.15	0.765646	-0.385251	1	1
AK018988	7.799	2.751	5.797	1.872	0.765662	-0.38522	1	1
Atg13	39.391	13.897	32.221	10.407	0.765725	-0.385102	0.621	1
Spns2	58.032	20.473	47.877	15.464	0.76673	-0.383209	0.6573	1
1810043H04Rik	23.765	8.384	19.184	6.196	0.766837	-0.383008	0.7666	1
Snora28	48.587	17.141	39.975	12.912	0.766882	-0.382924	0.6482	1
Rpl36a	6.761	2.385	4.941	1.596	0.766913	-0.382865	1	1
Pon3	16.59	5.853	13.178	4.256	0.766963	-0.38277	0.7336	1
Bag1	152.188	53.69	126.824	40.963	0.767288	-0.382159	0.5918	0.8517
Tnfrsf13b	0.86	0.303	0	0	0.76746	-0.381837	1	1
Lrrc51	4.896	1.727	3.386	1.094	0.767877	-0.381053	1	1
Tim9b	26.516	9.354	21.523	6.952	0.768012	-0.380799	0.7782	1
Zfp706	60.908	21.487	50.385	16.274	0.768177	-0.380489	0.663	1
Pdxdc1	108.059	38.122	89.949	29.053	0.768187	-0.380471	0.5721	1
AK216920	53.127	18.742	43.865	14.168	0.768311	-0.380237	0.6511	1
Plk1	21.43	7.56	17.28	5.581	0.768808	-0.379304	0.7666	1
Amy2a5	0.908	0.32	0.045	0.015	0.768939	-0.379058	1	1
AK050336	14.382	5.074	11.369	3.672	0.76918	-0.378607	1	1
Rad23a	45.392	16.014	37.439	12.092	0.769484	-0.378037	0.6401	1
Mrfap1	146.246	51.593	122.202	39.47	0.769494	-0.378018	0.5885	0.85
Spc25	15.456	5.453	12.28	3.966	0.769565	-0.377886	1	1
Aurkb	23.026	8.123	18.64	6.021	0.769593	-0.377832	0.7666	1
Brcc3	23.307	8.222	18.88	6.098	0.769681	-0.377667	0.7666	1
E130201H02Rik	5.875	2.073	4.23	1.366	0.769932	-0.377198	1	1
Epha8	1.059	0.374	0.18	0.058	0.770015	-0.377042	1	1
Klf2	121.769	42.958	101.759	32.867	0.77044	-0.376246	0.5804	1
Rims1	1.215	0.429	0.314	0.101	0.770469	-0.376191	1	1
Arhgef25	3.466	1.223	2.208	0.713	0.77058	-0.375983	1	1
Exosc4	23.671	8.351	19.215	6.206	0.770613	-0.375922	0.7666	1
AI314976	26.833	9.466	21.882	7.068	0.770877	-0.375427	0.7782	1
Vaultrc5	1.014	0.358	0.145	0.047	0.770987	-0.375222	1	1
Pkd1l2	1.437	0.507	0.502	0.162	0.771068	-0.375069	1	1
AK007998	3.508	1.238	2.247	0.726	0.771224	-0.374778	1	1
Otud3	47.364	16.709	39.214	12.666	0.771698	-0.373892	0.6482	1
C85492	14.883	5.251	11.838	3.824	0.771717	-0.373857	1	1
Dus2l	6.951	2.452	5.155	1.665	0.772016	-0.373297	1	1
D030047H15Rik	1.594	0.562	0.639	0.206	0.772087	-0.373165	1	1
2700029M09Rik	29.428	10.382	24.122	7.791	0.77236	-0.372655	0.7877	1
Cenpb	125.23	44.179	105.002	33.915	0.772815	-0.371805	0.583	1
Ddost	300.499	106.012	252.97	81.707	0.772876	-0.371691	0.5171	1
Lefty1	1.762	0.622	0.787	0.254	0.77312	-0.371236	1	1
Il33	5.514	1.945	3.953	1.277	0.773175	-0.371133	1	1
Cxcl15	0.883	0.312	0.047	0.015	0.773628	-0.370288	1	1
Serpind1	1.312	0.463	0.41	0.132	0.773753	-0.370056	1	1
Atp5c1	195.875	69.102	164.846	53.244	0.773787	-0.369992	0.6053	1
Ccdc152	1.607	0.567	0.659	0.213	0.774091	-0.369426	1	1
Rxra	30.336	10.702	24.952	8.059	0.774141	-0.369331	0.7861	1
Nuf2	8.128	2.867	6.174	1.994	0.774244	-0.369141	1	1
4921504E06Rik	0.865	0.305	0.034	0.011	0.774713	-0.368267	1	1
Pik3r5	1.344	0.474	0.44	0.142	0.774763	-0.368174	1	1
1500032L24Rik	187.162	66.028	157.731	50.946	0.77499	-0.367751	0.6037	1
Lsm5	8.14	2.872	6.206	2.004	0.775826	-0.366194	1	1
AK013794	2.014	0.711	1.015	0.328	0.776154	-0.365585	1	1
Ankle1	5.433	1.917	3.918	1.265	0.776483	-0.364974	1	1
Actg2	1.339	0.472	0.442	0.143	0.776495	-0.364952	1	1
Ifitm7	2.321	0.819	1.278	0.413	0.7768	-0.364384	1	1
Snord19	5.222	1.842	3.741	1.208	0.776918	-0.364166	1	1
Aifm3	4.959	1.749	3.518	1.136	0.77701	-0.363995	1	1
Mare	10.936	3.858	8.591	2.775	0.777069	-0.363886	1	1
Uts2	1.035	0.365	0.19	0.061	0.777289	-0.363476	1	1
Cmtm4	36.137	12.749	30.011	9.693	0.777729	-0.36266	0.7999	1
1700001O22Rik	3.686	1.3	2.442	0.789	0.777826	-0.36248	1	1
AK004252	2.768	0.977	1.666	0.538	0.777946	-0.362257	1	1
Acy1	18.266	6.444	14.839	4.793	0.778211	-0.361767	1	1
Itgb1bp1	17.949	6.332	14.572	4.707	0.778369	-0.361474	1	1
Rnf5	53.934	19.027	45.194	14.597	0.778799	-0.360678	0.8218	1
AK085459	1.638	0.578	0.71	0.229	0.778834	-0.360612	1	1
AK049852	2.292	0.809	1.265	0.409	0.778883	-0.360521	1	1
Cpt1a	103.864	36.642	87.691	28.323	0.778997	-0.360311	0.5688	1
Dus4l	4.035	1.423	2.748	0.888	0.779199	-0.359936	1	1
Chmp6	27.097	9.559	22.383	7.23	0.77943	-0.359509	0.7774	1
Cib1	94.478	33.33	79.767	25.764	0.77961	-0.359176	0.6963	1
Hint1	215.944	76.182	183.229	59.181	0.779728	-0.358956	0.6104	1
Spa17	3.022	1.066	1.891	0.611	0.779768	-0.358884	1	1
Carkd	93.742	33.071	79.176	25.573	0.77993	-0.358583	0.6963	1
Cask	18.307	6.458	14.913	4.817	0.779968	-0.358513	1	1
Ccdc124	100.549	35.472	85.016	27.459	0.780297	-0.357904	0.6982	1
Itgal	2.462	0.869	1.422	0.459	0.780631	-0.357287	1	1
Rps3a	227.362	80.21	193.19	62.399	0.78068	-0.357197	0.6124	1
Cetn2	27.802	9.808	23.028	7.438	0.780718	-0.357127	0.7774	1
Tmem147	126.953	44.787	107.589	34.75	0.780789	-0.356995	0.5855	1
Pex11b	11.789	4.159	9.38	3.03	0.781159	-0.356312	1	1
Snord11	0.794	0.28	0	0	0.78125	-0.356144	1	1
Tfb1m	15.435	5.445	12.497	4.036	0.781381	-0.355902	1	1
Fam181b	1.873	0.661	0.923	0.298	0.781457	-0.355762	1	1
AK144388	2.277	0.803	1.265	0.409	0.781475	-0.355728	1	1
Ggct	9.557	3.372	7.482	2.417	0.781565	-0.355563	1	1
Rpl4	1814.58	640.158	1548.95	500.298	0.781863	-0.355011	0.5496	1
Fam18b	52.138	18.394	43.865	14.168	0.782098	-0.35458	0.8186	1
Rplp0	1047.82	369.656	894.527	288.925	0.782194	-0.354401	0.5445	1
Nprl3	11.901	4.199	9.499	3.068	0.782458	-0.353914	1	1
Gosr2	51.247	18.079	43.133	13.932	0.782641	-0.353578	0.8186	1
Cd59b	1.602	0.565	0.696	0.225	0.782748	-0.353381	1	1
Rchy1	50.959	17.978	42.906	13.858	0.782907	-0.353088	0.8186	1
E2f2	3.099	1.093	1.978	0.639	0.783086	-0.352756	1	1
Fam185a	7.719	2.723	5.931	1.916	0.783239	-0.352475	1	1
mKIAA1897	18.983	6.697	15.575	5.031	0.783552	-0.351899	0.7522	1
Selm	21.624	7.629	17.849	5.765	0.783984	-0.351103	0.7666	1
Osgepl1	7.061	2.491	5.378	1.737	0.784016	-0.351045	1	1
DQ694705	0.78	0.275	0	0	0.784314	-0.350497	1	1
Shisa4	23.731	8.372	19.664	6.351	0.784358	-0.350416	0.7666	1
Alox8	1.399	0.494	0.533	0.172	0.784471	-0.350208	1	1
Ndufb11	153.147	54.028	130.579	42.176	0.784619	-0.349936	0.5949	1
BC056474	39.135	13.806	32.886	10.622	0.784952	-0.349324	0.8055	1
Snhg12	108.65	38.33	92.517	29.882	0.785202	-0.348864	0.7042	1
Npm3	25.149	8.872	20.91	6.754	0.785454	-0.348402	0.7782	1
Try5	3310.84	1168.02	2840.14	917.342	0.785568	-0.348192	0.5533	1
Nudc	191.728	67.639	163.847	52.921	0.785574	-0.348181	0.606	1
Car5b	1.65	0.582	0.751	0.243	0.785714	-0.347923	1	1
Fgf13	5.157	1.819	3.763	1.215	0.78574	-0.347877	1	1
Dnlz	13.22	4.664	10.683	3.451	0.78584	-0.347692	0.7084	1
Tmem203	13.198	4.656	10.667	3.445	0.785891	-0.347599	0.7084	1
Cgref1	12.567	4.433	10.125	3.27	0.785938	-0.347513	1	1
E130203B14Rik	1.579	0.557	0.693	0.224	0.786127	-0.347165	1	1
Pm20d2	1.462	0.516	0.593	0.192	0.78628	-0.346886	1	1
Ccbe1	6.293	2.22	4.742	1.532	0.786335	-0.346783	1	1
Rpl7a	61.486	21.691	52.148	16.843	0.786347	-0.346762	0.6683	1
Hamp	3.995	1.409	2.772	0.895	0.786633	-0.346237	1	1
Pigq	39.908	14.079	33.641	10.866	0.786922	-0.345707	0.8055	1
Impa1	32.707	11.539	27.463	8.87	0.787144	-0.3453	0.7935	1
Hibadh	52.311	18.455	44.323	14.316	0.787253	-0.345101	0.8186	1
Alg12	11.393	4.019	9.142	2.953	0.787607	-0.344452	1	1
Setd6	20.735	7.315	17.181	5.549	0.787613	-0.344442	1	1
Ust	1.39	0.49	0.538	0.174	0.787919	-0.34388	1	1
Dysfip1	0.977	0.345	0.187	0.06	0.788104	-0.343542	1	1
Rdh10	112.325	39.627	96.037	31.019	0.788121	-0.343511	0.7061	1
Fxc1	21.158	7.464	17.558	5.671	0.788162	-0.343437	1	1
2810432D09Rik	24.215	8.543	20.191	6.522	0.788222	-0.343327	0.7782	1
Mmachc	12.344	4.355	9.971	3.221	0.788235	-0.343302	1	1
Mdp1	21.348	7.531	17.728	5.726	0.788419	-0.342966	0.7666	1
Rps25	14.21	5.013	11.586	3.742	0.788625	-0.342589	1	1
Mast3	41.845	14.762	35.406	11.436	0.788986	-0.341928	0.6311	1
Scn1b	7.725	2.725	6.002	1.939	0.788993	-0.341915	1	1
DQ567786	0.758	0.267	0	0	0.789266	-0.341417	1	1
Yif1a	34.9	12.312	29.435	9.507	0.789288	-0.341377	0.8025	1
Ftsj2	3.839	1.354	2.658	0.859	0.78972	-0.340588	1	1
Tars	102.313	36.095	87.628	28.303	0.789945	-0.340176	0.7003	1
Clca3	1.07	0.377	0.273	0.088	0.790123	-0.33985	1	1
Atg9a	23.9	8.432	19.978	6.453	0.790182	-0.339742	0.7666	1
Fam162a	49.063	17.309	41.702	13.469	0.790267	-0.339588	0.6482	1
Tpd52	112.228	39.592	96.221	31.079	0.790279	-0.339566	0.7061	1
Bcl2l2	35.19	12.415	29.734	9.604	0.790458	-0.339238	0.8025	1
Nt5c3	55.864	19.708	47.611	15.378	0.790902	-0.338429	0.6573	1
1810063B05Rik	16.65	5.874	13.738	4.437	0.790951	-0.338339	0.7336	1
BC048761	1.49	0.526	0.641	0.207	0.790957	-0.338329	1	1
Rps4x	219.612	77.476	189.089	61.074	0.790993	-0.338262	0.6132	1
Pomp	62.302	21.979	53.181	17.177	0.791027	-0.338202	0.6683	1
Cox17	141.555	49.939	121.709	39.311	0.791358	-0.337597	0.5915	1
Bmpr1b	3.177	1.121	2.101	0.679	0.791608	-0.337142	1	1
Rsph3a	5.193	1.832	3.846	1.242	0.791667	-0.337035	1	1
2010107E04Rik	210.666	74.32	181.548	58.639	0.791808	-0.336777	0.6127	1
1810046J19Rik	69.804	24.626	59.735	19.294	0.79193	-0.336555	0.6752	1
Rps27a	10.406	3.671	8.362	2.701	0.792336	-0.335816	1	1
Vps25	84.908	29.954	72.838	23.526	0.792337	-0.335814	0.6926	1
Gnptab	29.073	10.257	24.524	7.921	0.792485	-0.335545	0.7877	1
Nppc	5.938	2.095	4.499	1.453	0.792569	-0.335392	1	1
Park7	213.92	75.468	184.617	59.63	0.792881	-0.334824	0.6138	1
Eid1	31.043	10.952	26.244	8.477	0.792922	-0.33475	0.7861	1
N6amt2	18.925	6.676	15.751	5.087	0.792991	-0.334623	0.7522	1
Sdhb	131.863	46.519	113.575	36.684	0.79303	-0.334552	0.7149	1
Rpn2	336.009	118.539	290.406	93.799	0.793038	-0.334538	0.6276	1
Ckap2l	16.029	5.655	13.244	4.278	0.793088	-0.334447	0.7336	1
Muc1	505.024	178.165	436.899	141.115	0.793207	-0.33423	0.6378	1
Gpr180	15.552	5.487	12.836	4.146	0.793279	-0.3341	1	1
Ttc32	7.042	2.484	5.461	1.764	0.793341	-0.333987	1	1
AK181896	16.429	5.796	13.602	4.393	0.793555	-0.333598	0.7336	1
Boc	2.679	0.945	1.683	0.544	0.79383	-0.333097	1	1
Alg1	29.69	10.474	25.105	8.109	0.793882	-0.333004	0.7877	1
Fam114a1	35.399	12.488	30.067	9.711	0.794113	-0.332583	0.8025	1
Reg1	7380.37	2603.69	6401.46	2067.62	0.794191	-0.332443	0.5568	1
Mrpl43	45.927	16.202	39.217	12.667	0.794501	-0.33188	0.8148	1
Pqlc3	2.959	1.044	1.931	0.624	0.794521	-0.331844	1	1
Psmg1	35.375	12.48	30.082	9.716	0.794955	-0.331054	0.8025	1
Abcg5	0.884	0.312	0.132	0.043	0.79497	-0.331029	1	1
AK018450	2.208	0.779	1.285	0.415	0.795391	-0.330264	1	1
Polr1e	9.996	3.526	8.05	2.6	0.795404	-0.33024	1	1
Thoc7	100.863	35.583	87.03	28.11	0.795725	-0.329659	0.7003	1
Mir194-1	1.343	0.474	0.537	0.173	0.795794	-0.329534	1	1
A1cf	1.734	0.612	0.877	0.283	0.795906	-0.329331	1	1
Parp16	18.229	6.431	15.221	4.916	0.796124	-0.328934	1	1
Mrpl51	17.993	6.348	15.015	4.85	0.796135	-0.328915	1	1
Cog8	29.783	10.507	25.272	8.163	0.796298	-0.32862	0.7861	1
Slc25a1	60.839	21.463	52.285	16.888	0.796332	-0.328559	0.8274	1
Zfp946	5.13	1.81	3.837	1.239	0.796797	-0.327716	1	1
Kng1	0.857	0.302	0.118	0.038	0.797235	-0.326923	1	1
Smpdl3b	6.761	2.385	5.259	1.699	0.797341	-0.326731	1	1
Cox7a2	119.513	42.162	103.469	33.42	0.797461	-0.326515	0.7092	1
Tprkb	21.337	7.527	17.961	5.801	0.797584	-0.326291	0.7666	1
Hint3	22.175	7.823	18.695	6.038	0.797688	-0.326104	0.7666	1
Best1	0.963	0.34	0.214	0.069	0.797761	-0.325971	1	1
B4galt2	12.356	4.359	10.142	3.276	0.79791	-0.325702	1	1
Pgls	60.564	21.366	52.166	16.849	0.798042	-0.325464	0.8274	1
Cnpy3	57.749	20.373	49.745	16.067	0.798531	-0.32458	0.8247	1
Kcnd3	1.147	0.405	0.377	0.122	0.798577	-0.324497	1	1
Cldn9	1.421	0.501	0.617	0.199	0.798801	-0.324092	1	1
Etfa	71.792	25.327	62.053	20.043	0.799294	-0.323203	0.6819	1
DQ704729	0.796	0.281	0.074	0.024	0.799375	-0.323055	1	1
AK045807	0.825	0.291	0.098	0.032	0.79938	-0.323046	1	1
Hspb6	9.727	3.432	7.873	2.543	0.799413	-0.322986	1	1
Clpx	43.892	15.484	37.705	12.178	0.799442	-0.322935	0.8104	1
AK031828	0.77	0.272	0.052	0.017	0.799528	-0.322779	1	1
AK040320	1.623	0.573	0.798	0.258	0.799746	-0.322387	1	1
DQ720689	3	1.058	2	0.646	0.799806	-0.322279	1	1
Mrps28	48.625	17.154	41.861	13.521	0.799879	-0.322147	0.8187	1
Ier3ip1	39.195	13.827	33.624	10.86	0.799892	-0.322123	0.8055	1
LOC100302626	3.119	1.1	2.106	0.68	0.8	-0.321928	1	1
Eps8l3	8.538	3.012	6.841	2.21	0.8001	-0.321748	1	1
Ada	6.23	2.198	4.83	1.56	0.8005	-0.321026	1	1
SK2	1.151	0.406	0.391	0.126	0.800853	-0.32039	1	1
TCR-beta_chain	3.03	1.069	2.034	0.657	0.80087	-0.32036	1	1
2310035K24Rik	9.045	3.191	7.297	2.357	0.801002	-0.320122	1	1
Ccdc58	15.771	5.564	13.183	4.258	0.801036	-0.320061	0.7336	1
Steap3	3.537	1.248	2.479	0.801	0.801157	-0.319844	1	1
Pxmp3	32.903	11.608	28.178	9.101	0.801158	-0.319841	0.7935	1
Nudt12	6.128	2.162	4.748	1.534	0.801392	-0.319421	1	1
AK028111	0.964	0.34	0.229	0.074	0.801493	-0.319239	1	1
Nqo1	1.51	0.533	0.709	0.229	0.801696	-0.318873	1	1
Dnajb14	5.486	1.935	4.189	1.353	0.801704	-0.318859	1	1
Hist1h1c	123.83	43.685	107.84	34.831	0.801857	-0.318582	0.7122	1
AK052161	3.26	1.15	2.242	0.724	0.80186	-0.318577	1	1
Morn2	5.039	1.778	3.803	1.228	0.802016	-0.318297	1	1
Kif22	26.868	9.479	22.954	7.414	0.802939	-0.316637	0.7782	1
Chad	2.564	0.905	1.641	0.53	0.80315	-0.316259	1	1
Abcc6	1.738	0.613	0.915	0.296	0.803472	-0.315681	1	1
Exosc2	33.115	11.682	28.452	9.19	0.803501	-0.315628	0.7935	1
Pla2g4a	18.769	6.621	15.866	5.125	0.8037	-0.31527	0.7522	1
Zswim7	6.281	2.216	4.907	1.585	0.803794	-0.315103	1	1
Nrbf2	8.84	3.119	7.154	2.311	0.803836	-0.315027	1	1
AB338584	0.692	0.244	0	0	0.803859	-0.314986	1	1
Shisa7	1.516	0.535	0.726	0.234	0.803909	-0.314896	1	1
Gm12238	1.331	0.47	0.565	0.182	0.804082	-0.314586	1	1
Atg5	21.668	7.644	18.429	5.952	0.804257	-0.314271	0.7666	1
Triap1	28.912	10.2	24.793	8.008	0.804286	-0.31422	0.7877	1
Kazald1	1.107	0.391	0.367	0.119	0.804457	-0.313912	1	1
Gm6644	7.43	2.621	5.922	1.913	0.804474	-0.313882	1	1
Cpa3	0.747	0.264	0.054	0.017	0.804589	-0.313677	1	1
AK164124	8.104	2.859	6.516	2.105	0.804613	-0.313634	1	1
Wdr25	4.597	1.622	3.437	1.11	0.804729	-0.313425	1	1
Syt16	0.883	0.312	0.174	0.056	0.804878	-0.313158	1	1
Farp2	8.865	3.127	7.191	2.323	0.805185	-0.312607	1	1
Med30	20.822	7.346	17.712	5.721	0.805296	-0.312409	1	1
Pa2g4	151.66	53.503	132.796	42.892	0.805313	-0.312378	0.7216	1
Nkx6-3	0.939	0.331	0.224	0.072	0.805409	-0.312206	1	1
Fos	1843.51	650.364	1621.49	523.728	0.805583	-0.311894	0.6541	1
Mns1	3.219	1.136	2.232	0.721	0.805712	-0.311665	1	1
Sgk2	1.923	0.678	1.09	0.352	0.805721	-0.311648	1	1
Tyms-ps	6.459	2.279	5.085	1.642	0.805733	-0.311625	1	1
Adam11	3.136	1.106	2.159	0.697	0.805793	-0.311519	1	1
Rab7l1	9.959	3.513	8.163	2.637	0.805894	-0.311338	1	1
dj-1	203.688	71.858	178.733	57.729	0.806075	-0.311014	0.6136	1
Acd	14.136	4.987	11.846	3.826	0.80608	-0.311005	1	1
Srp54c	8.524	3.007	6.903	2.23	0.806089	-0.310988	1	1
mKIAA0897	2.678	0.945	1.759	0.568	0.80617	-0.310845	1	1
Atg9	27.597	9.736	23.703	7.656	0.806259	-0.310684	0.7877	1
Smc2	19.527	6.889	16.599	5.361	0.806313	-0.310589	0.7522	1
Scrn2	27.242	9.611	23.396	7.557	0.806427	-0.310384	0.7877	1
Cyc1	136.675	48.217	119.818	38.7	0.806632	-0.310018	0.7178	1
Snora21	4.031	1.422	2.953	0.954	0.806771	-0.309768	1	1
9430069I07Rik	1.251	0.441	0.505	0.163	0.807078	-0.309219	1	1
Gm6724	1.941	0.685	1.115	0.36	0.807122	-0.309142	1	1
Rnd2	42.89	15.131	37.235	12.027	0.807575	-0.308331	0.8104	1
Metap2	51.002	17.993	44.41	14.344	0.807877	-0.307793	0.8186	1
Haus1	11.098	3.915	9.2	2.972	0.808138	-0.307326	1	1
Mesp2	1.111	0.392	0.387	0.125	0.80819	-0.307234	1	1
Me2	27.33	9.642	23.54	7.603	0.808401	-0.306858	0.7877	1
Fam184a	2.247	0.793	1.392	0.45	0.808701	-0.306323	1	1
AK131821	0.93	0.328	0.23	0.074	0.808735	-0.306261	1	1
AK138554	0.796	0.281	0.113	0.036	0.808743	-0.306246	1	1
Hsf4	1.229	0.434	0.495	0.16	0.808926	-0.30592	1	1
Fkbp6	1.442	0.509	0.683	0.221	0.809145	-0.30553	1	1
Dhfr	7.02	2.477	5.615	1.814	0.809318	-0.305221	1	1
Ndufb7	110.842	39.103	97.394	31.457	0.809341	-0.305181	0.7061	1
Gstm5	67.314	23.747	58.914	19.029	0.809351	-0.305163	0.6777	1
Ndufb6	102.929	36.312	90.47	29.221	0.809954	-0.304088	0.7033	1
Gltp	47.572	16.783	41.52	13.411	0.810381	-0.303328	0.6482	1
Pno1	44.993	15.873	39.248	12.677	0.810585	-0.302965	0.8148	1
Mfsd7c	1.761	0.621	0.972	0.314	0.810611	-0.302919	1	1
Bnip1	26.678	9.412	23.048	7.444	0.810987	-0.302249	0.7782	1
Itgb5	13.232	4.668	11.139	3.598	0.811221	-0.301833	1	1
D9Ertd402e	2.76	0.974	1.864	0.602	0.81155	-0.301248	1	1
Aven	31.241	11.021	27.113	8.757	0.811663	-0.301047	0.7957	1
Tomm5	27.604	9.738	23.888	7.716	0.811697	-0.300987	0.7877	1
AK150172	2.103	0.742	1.282	0.414	0.811711	-0.300963	1	1
Mrpl47	18.453	6.51	15.777	5.096	0.811718	-0.30095	0.7522	1
Gm6402	3.815	1.346	2.802	0.905	0.81202	-0.300412	1	1
Hs3st6	1.164	0.411	0.452	0.146	0.81219	-0.300111	1	1
Troap	6.901	2.435	5.542	1.79	0.812227	-0.300045	1	1
2210015D19Rik	5.154	1.818	3.99	1.289	0.812278	-0.299954	1	1
Akr1b3	7.361	2.597	5.955	1.923	0.812622	-0.299344	1	1
Acn9	12.384	4.369	10.413	3.363	0.812628	-0.299333	1	1
Cpox	33.681	11.882	29.318	9.469	0.812684	-0.299233	0.7935	1
Rcl1	29.072	10.256	25.226	8.148	0.812722	-0.299166	0.7877	1
Tmem64	44.921	15.847	39.304	12.695	0.812904	-0.298842	0.8148	1
Pbld	3.016	1.064	2.098	0.678	0.812984	-0.2987	1	1
Psmd13	81.32	28.689	71.636	23.138	0.813028	-0.298622	0.6895	1
Tuba8	4.852	1.712	3.731	1.205	0.813053	-0.298579	1	1
Fam98a	35.288	12.449	30.758	9.935	0.813072	-0.298546	0.8025	1
Eif2s2	34.723	12.25	30.261	9.774	0.813132	-0.298438	0.8025	1
Nusap1	14.511	5.119	12.311	3.976	0.813205	-0.298309	1	1
Lxn	46.983	16.575	41.163	13.295	0.813371	-0.298014	0.6482	1
Nkx6-2	3.79	1.337	2.789	0.901	0.813436	-0.297899	1	1
Asgr2	0.692	0.244	0.036	0.012	0.813505	-0.297777	1	1
Dennd2d	32.272	11.385	28.1	9.076	0.813565	-0.297671	0.7957	1
Pycrl	44.647	15.751	39.103	12.63	0.813683	-0.297462	0.8148	1
Dnajc19	10.197	3.597	8.485	2.741	0.813792	-0.297269	1	1
AK212965	39.754	14.025	34.761	11.228	0.813844	-0.297177	0.8055	1
Pdia5	31.431	11.088	27.369	8.84	0.81403	-0.296845	0.7957	1
Mrpl55	26.212	9.247	22.73	7.342	0.814092	-0.296736	0.7782	1
Bdh1	13.865	4.891	11.756	3.797	0.814293	-0.29638	1	1
Osbpl2	46.154	16.282	40.482	13.075	0.814431	-0.296135	0.8148	1
2310003L22Rik	3.017	1.064	2.107	0.681	0.814438	-0.296123	1	1
Pdcd2	26.959	9.511	23.413	7.562	0.814575	-0.29588	0.7877	1
AK080258	8.938	3.153	7.379	2.383	0.814592	-0.295851	1	1
Eda2r	7.019	2.476	5.671	1.832	0.81473	-0.295607	1	1
Chchd3	71.458	25.209	63.02	20.355	0.814796	-0.295488	0.6819	1
Zmat5	21.625	7.629	18.672	6.031	0.814811	-0.295463	0.7666	1
Gm9934	1.321	0.466	0.605	0.195	0.815143	-0.294874	1	1
Tmem106c	35.083	12.377	30.666	9.905	0.815205	-0.294765	0.8025	1
Os9	195.643	69.02	173.637	56.083	0.815239	-0.294706	0.7316	1
Lamp1	357.752	126.21	318.024	102.719	0.815337	-0.294532	0.6332	1
Snrnp25	8.082	2.851	6.627	2.14	0.815373	-0.294469	1	1
Flrt3	54.45	19.209	47.92	15.478	0.815379	-0.294457	0.8218	1
Elof1	57.314	20.22	50.477	16.304	0.815457	-0.294319	0.8247	1
Ldlrad3	26.193	9.241	22.761	7.352	0.815545	-0.294163	0.7782	1
Arl1	103.33	36.453	91.485	29.549	0.815662	-0.293956	0.8485	1
Ndufa5	55.778	19.678	49.129	15.868	0.815746	-0.293808	0.8247	1
Cox19	30.045	10.599	26.202	8.463	0.815846	-0.293631	0.7861	1
1810012P15Rik	3.417	1.205	2.475	0.799	0.815873	-0.293583	1	1
Gm6548	108.757	38.368	96.352	31.121	0.815916	-0.293507	0.7076	1
Appl2	93.341	32.929	82.614	26.684	0.815939	-0.293466	0.701	1
Nrp1	80.834	28.517	71.477	23.086	0.816004	-0.293351	0.6895	1
Brp44l	7.907	2.789	6.478	2.092	0.816046	-0.293277	1	1
9030617O03Rik	9.742	3.437	8.116	2.621	0.816092	-0.293196	1	1
Tbc1d30	7.141	2.519	5.797	1.872	0.816141	-0.29311	1	1
Ugt2a3	0.849	0.3	0.189	0.061	0.816154	-0.293087	1	1
Gm7120	22.162	7.818	19.186	6.197	0.816171	-0.293056	0.7666	1
Snrnp27	35.298	12.453	30.901	9.981	0.816249	-0.292918	0.8025	1
D2Wsu81e	30.031	10.595	26.213	8.467	0.816473	-0.292524	0.7861	1
Nr5a2	84.065	29.657	74.405	24.032	0.816518	-0.292443	0.6926	1
EF437368	48.81	17.219	42.969	13.879	0.816675	-0.292166	0.8187	1
Eif3i	132.561	46.766	117.696	38.015	0.816794	-0.291955	0.7164	1
Sec14l2	7.131	2.516	5.798	1.873	0.817122	-0.291377	1	1
Immp2l	6.271	2.212	5.032	1.625	0.817248	-0.291154	1	1
Eef1a1	2006.5	707.864	1791.53	578.649	0.817715	-0.290329	0.6552	1
AK015782	0.929	0.328	0.267	0.086	0.817771	-0.290231	1	1
Spin2	2.302	0.812	1.493	0.482	0.817881	-0.290038	1	1
Ergic1	65.451	23.09	57.91	18.704	0.817933	-0.289946	0.8322	1
Tem8	4.297	1.516	3.276	1.058	0.817965	-0.289889	1	1
A930017M01Rik	0.73	0.258	0.09	0.029	0.817965	-0.289889	1	1
Tssk3	0.857	0.302	0.202	0.065	0.817972	-0.289876	1	1
Arhgap6	2.555	0.901	1.719	0.555	0.817991	-0.289844	1	1
Aup1	136.421	48.127	121.341	39.192	0.818124	-0.289608	0.7178	1
Hook1	38.941	13.738	34.247	11.061	0.818361	-0.289191	0.8055	1
Phf5a	38.462	13.569	33.817	10.923	0.818381	-0.289155	0.8055	1
Pla2g16	17.614	6.214	15.184	4.904	0.818409	-0.289107	1	1
Pgm3	19.156	6.758	16.57	5.352	0.818768	-0.288474	0.7522	1
Tmem42	7.396	2.609	6.052	1.955	0.818786	-0.288441	1	1
Stt3a	237.169	83.67	211.577	68.338	0.818921	-0.288205	0.6199	1
Gabarap	301.824	106.479	269.472	87.037	0.819109	-0.287873	0.7444	1
Pdk2	28.833	10.172	25.242	8.153	0.81928	-0.287571	0.7877	1
Eme1	19.755	6.969	17.118	5.529	0.8193	-0.287537	1	1
Zdhhc3	22.089	7.793	19.211	6.205	0.819402	-0.287357	0.7666	1
AK083203	3.491	1.232	2.567	0.829	0.819444	-0.287282	1	1
Tmed10	53.178	18.76	47.048	15.196	0.819636	-0.286945	0.8218	1
Abcb9	2.999	1.058	2.127	0.687	0.819728	-0.286783	1	1
Nmnat3	4.213	1.486	3.213	1.038	0.819791	-0.286672	1	1
Foxp2	3.672	1.295	2.731	0.882	0.820044	-0.286228	1	1
Pnliprp1	7194.11	2537.98	6443.46	2081.18	0.820088	-0.28615	0.6593	1
AK039495	0.98	0.346	0.321	0.104	0.820208	-0.285938	1	1
Mat1a	29.25	10.319	25.648	8.284	0.820214	-0.285928	0.7877	1
Cox18	15.814	5.579	13.613	4.397	0.820337	-0.285711	0.7336	1
Fam132b	5.378	1.897	4.264	1.377	0.820504	-0.285418	1	1
Hes1	422.119	148.917	377.769	122.016	0.820561	-0.285318	0.6372	1
Chst5	1.37	0.483	0.672	0.217	0.820634	-0.285189	1	1
Cks1b	45.165	15.934	39.93	12.897	0.820657	-0.285149	0.8148	1
Acp1	10.224	3.607	8.611	2.781	0.820708	-0.28506	1	1
Tspan17	3.955	1.395	2.992	0.966	0.820877	-0.284762	1	1
Rps26	636	224.372	569.917	184.079	0.821216	-0.284167	0.6449	1
Rnf7	24.615	8.684	21.532	6.955	0.821458	-0.283741	0.7782	1
Taf12	18.539	6.54	16.084	5.195	0.821618	-0.28346	0.7522	1
Cyp2c44	0.757	0.267	0.126	0.041	0.821626	-0.283446	1	1
Mpg	18.396	6.49	15.963	5.156	0.821896	-0.282972	1	1
1110034A24Rik	19.331	6.82	16.808	5.429	0.822123	-0.282574	0.7522	1
Trmt61a	17.069	6.022	14.779	4.773	0.82213	-0.282561	1	1
Melk	17.319	6.11	15.004	4.846	0.822222	-0.2824	1	1
Kcnn2	0.947	0.334	0.299	0.097	0.822339	-0.282195	1	1
8430429K09Rik	5.561	1.962	4.446	1.436	0.822417	-0.282058	1	1
Dhrs1	60.973	21.51	54.244	17.52	0.822745	-0.281482	0.8299	1
Oat	64.181	22.642	57.132	18.453	0.822815	-0.281359	0.6732	1
Eif3m	118.017	41.635	105.539	34.088	0.822986	-0.281061	0.7114	1
Asf1b	10.717	3.781	9.086	2.935	0.82305	-0.280949	1	1
Polr2i	31.471	11.103	27.752	8.964	0.823267	-0.280568	0.7957	1
2610528J11Rik	18.819	6.639	16.378	5.29	0.823406	-0.280324	0.7522	1
Rpl37a	30.437	10.738	26.832	8.667	0.823564	-0.280046	0.7957	1
Fam4a2	9.02	3.182	7.571	2.445	0.823769	-0.279689	1	1
AK043612	1.114	0.393	0.459	0.148	0.824121	-0.279073	1	1
Tmem5	30.05	10.601	26.507	8.562	0.824239	-0.278865	0.7957	1
AK148461	2.237	0.789	1.471	0.475	0.824483	-0.278438	1	1
Psd2	0.77	0.272	0.151	0.049	0.824686	-0.278084	1	1
Gorasp1	27.222	9.604	23.98	7.745	0.824689	-0.278078	0.7877	1
Cdc20	46.128	16.273	41.01	13.246	0.824755	-0.277962	0.8148	1
9230114K14Rik	1.209	0.427	0.547	0.177	0.824807	-0.277871	1	1
Ict1	56.662	19.99	50.543	16.325	0.825393	-0.276847	0.8247	1
Marcks	88.185	31.11	78.982	25.511	0.825631	-0.276432	0.8439	1
Rpl22	207.773	73.299	186.851	60.351	0.825731	-0.276256	0.7341	1
Calml4	2.095	0.739	1.35	0.436	0.825762	-0.276202	1	1
Itgb2	1.429	0.504	0.75	0.242	0.825798	-0.276139	1	1
Cox6c	95.485	33.686	85.598	27.647	0.825895	-0.275969	0.7036	1
Dnajc30	16.722	5.899	14.549	4.699	0.826062	-0.275678	1	1
Dhx29	11.607	4.095	9.936	3.209	0.826104	-0.275605	1	1
Rpl23	59.619	21.033	53.258	17.202	0.826124	-0.275569	0.8274	1
1700029F09Rik	45.367	16.005	40.404	13.05	0.826228	-0.275389	0.8148	1
Ckmt1	15.816	5.58	13.736	4.437	0.826292	-0.275277	0.7336	1
Mrps18a	70.44	24.85	63.036	20.36	0.826306	-0.275253	0.6819	1
Fam58b	11.234	3.963	9.6	3.101	0.826315	-0.275237	1	1
Ceacam1	65.917	23.255	58.967	19.046	0.826469	-0.274968	0.8322	1
Mnat1	28.124	9.922	24.858	8.029	0.82668	-0.274599	0.7877	1
Snord15b	1.372	0.484	0.703	0.227	0.826819	-0.274356	1	1
Cuta	59.601	21.026	53.292	17.213	0.826886	-0.274239	0.8274	1
Dutp	13.646	4.814	11.79	3.808	0.826969	-0.274094	1	1
Clpb	20.551	7.25	18.033	5.825	0.827273	-0.273565	1	1
Ppp1r14b	25.466	8.984	22.478	7.26	0.827324	-0.273476	0.7782	1
AK160141	1.9	0.67	1.182	0.382	0.827545	-0.27309	1	1
Ufm1	25.147	8.871	22.198	7.17	0.827677	-0.27286	0.7782	1
Rab6b	2.42	0.854	1.656	0.535	0.82794	-0.272403	1	1
Aurka	18.891	6.664	16.552	5.346	0.828027	-0.27225	0.7522	1
Slamf9	4.979	1.757	3.973	1.283	0.828074	-0.272168	1	1
Pigb	14.071	4.964	12.199	3.94	0.828303	-0.271769	1	1
Fabp1	0.701	0.247	0.102	0.033	0.828388	-0.271621	1	1
Arl9	0.738	0.26	0.135	0.044	0.828571	-0.271302	1	1
Morc4	15.604	5.505	13.594	4.391	0.828747	-0.270996	0.7336	1
Eml6	1.955	0.69	1.241	0.401	0.828994	-0.270566	1	1
Stat4	1.698	0.599	1.008	0.326	0.829268	-0.270089	1	1
2610528E23Rik	16.756	5.911	14.649	4.732	0.829402	-0.269856	1	1
Hdhd3	4.765	1.681	3.791	1.224	0.829541	-0.269614	1	1
Gm10767	3.071	1.083	2.255	0.728	0.829573	-0.26956	1	1
Prrc1	29.417	10.378	26.128	8.439	0.829583	-0.269541	0.7877	1
AK133446	0.582	0.205	0	0	0.829876	-0.269033	1	1
Fam149b	13.498	4.762	11.71	3.782	0.82992	-0.268956	1	1
Sycp3	1.918	0.677	1.214	0.392	0.830054	-0.268723	1	1
Cep55	12.417	4.381	10.737	3.468	0.830329	-0.268245	1	1
Ndufaf4	6.616	2.334	5.477	1.769	0.830534	-0.267889	1	1
Dzip1	1.281	0.452	0.637	0.206	0.830579	-0.267812	1	1
Ccdc107	34.642	12.221	30.915	9.985	0.830875	-0.267296	0.8025	1
Jagn1	45.55	16.069	40.829	13.187	0.831156	-0.266809	0.8148	1
Beta-s	4.538	1.601	3.599	1.162	0.831219	-0.2667	1	1
Fkbpl	6.817	2.405	5.668	1.831	0.831424	-0.266343	1	1
Itgb3bp	2.664	0.94	1.899	0.613	0.831443	-0.26631	1	1
Tiam1	16.376	5.777	14.351	4.635	0.831489	-0.266231	1	1
Dusp28	4.926	1.738	3.955	1.277	0.831629	-0.265988	1	1
Mycbp	18.195	6.419	16.006	5.17	0.831648	-0.265954	1	1
Ak4	1.465	0.517	0.811	0.262	0.831905	-0.265509	1	1
Rab39b	1.144	0.404	0.519	0.168	0.831909	-0.265503	1	1
Pex16	23.915	8.437	21.224	6.855	0.832362	-0.264717	1	1
Ndufa13	78.07	27.542	70.476	22.763	0.832563	-0.264369	0.8397	1
Txndc5	145.15	51.207	131.48	42.467	0.832589	-0.264323	0.7216	1
Apoc2	2.013	0.71	1.312	0.424	0.832749	-0.264047	1	1
BC050122	1.254	0.442	0.623	0.201	0.832871	-0.263835	1	1
Ndufa11	16.436	5.798	14.439	4.664	0.833186	-0.263289	1	1
C230052I12Rik	7.718	2.723	6.507	2.102	0.833199	-0.263267	1	1
Mir1933	0.568	0.2	0	0	0.833333	-0.263034	1	1
Mir703	118.523	41.813	107.367	34.679	0.833368	-0.262974	0.7151	1
Gnb2l1	1958.7	691.003	1782.73	575.807	0.833533	-0.26269	0.6571	1
AK043607	0.777	0.274	0.193	0.062	0.833595	-0.262582	1	1
Imp3	61.611	21.735	55.593	17.956	0.833781	-0.26226	0.8299	1
Arsb	17.138	6.046	15.096	4.876	0.833948	-0.26197	1	1
Plcg2	10.83	3.821	9.352	3.021	0.834059	-0.261778	1	1
Smpdl3a	48.559	17.131	43.73	14.124	0.834151	-0.261619	0.8187	1
Golga5	41.624	14.684	37.424	12.088	0.834481	-0.261049	0.8104	1
Hspd1	89.089	31.429	80.695	26.064	0.834562	-0.260909	0.8439	1
Mrpl52	136.336	48.097	123.785	39.982	0.834715	-0.260644	0.7206	1
Txn2	68.834	24.284	62.25	20.106	0.834757	-0.260572	0.8344	1
Pdia4	224.215	79.1	203.933	65.869	0.834819	-0.260465	0.7377	1
AK005306	1.823	0.643	1.152	0.372	0.835058	-0.260052	1	1
Wdr72	6.677	2.356	5.581	1.803	0.835221	-0.259771	1	1
5830433M19Rik	5.511	1.944	4.517	1.459	0.835258	-0.259706	1	1
Dtwd1	6.912	2.438	5.797	1.872	0.835369	-0.259514	1	1
Atg10	5.586	1.971	4.587	1.482	0.835409	-0.259445	1	1
Unc79	1.285	0.453	0.662	0.214	0.835513	-0.259266	1	1
Klhdc8a	0.75	0.265	0.176	0.057	0.835573	-0.259162	1	1
Cd59a	6.63	2.339	5.543	1.79	0.83558	-0.259151	1	1
Sec24d	60.857	21.469	55.045	17.779	0.835774	-0.258816	0.8311	1
Naca	55.222	19.482	49.919	16.123	0.836002	-0.258421	0.8255	1
Pif1	1.404	0.495	0.773	0.25	0.83612	-0.258217	1	1
AK158619	0.802	0.283	0.227	0.073	0.836321	-0.257871	1	1
AK139359	1.999	0.705	1.32	0.426	0.836364	-0.257798	1	1
Odf3b	0.751	0.265	0.181	0.058	0.836364	-0.257798	1	1
Rpl32	854.042	301.294	779.984	251.928	0.836695	-0.257226	0.7607	1
Aen	23.864	8.419	21.303	6.881	0.836713	-0.257195	1	1
Uxt	2.983	1.052	2.22	0.717	0.836745	-0.257141	1	1
Mir302b	0.554	0.195	0	0	0.83682	-0.257011	1	1
Klk1b27	0.675	0.238	0.113	0.036	0.836834	-0.256987	1	1
Ska1	3.368	1.188	2.575	0.832	0.837294	-0.256193	1	1
Afm	4.02	1.418	3.173	1.025	0.837469	-0.255892	1	1
AK049668	2.892	1.02	2.144	0.692	0.837624	-0.255626	1	1
Pdf	24.675	8.705	22.077	7.131	0.837816	-0.255295	0.7782	1
Klf12	1.062	0.375	0.471	0.152	0.837818	-0.255291	1	1
mKIAA1038	47.522	16.765	42.995	13.887	0.837996	-0.254985	0.8187	1
Nsg1	4.434	1.564	3.558	1.149	0.838144	-0.254731	1	1
Ncl	201.578	71.114	184.088	59.459	0.838381	-0.254322	0.7341	1
Taf1d	53.662	18.931	48.638	15.71	0.838392	-0.254302	0.8255	1
Sidt1	5.66	1.997	4.684	1.513	0.838505	-0.254108	1	1
Mrpl27	24.9	8.784	22.304	7.204	0.838512	-0.254097	0.7782	1
Mapkapk3	21.548	7.602	19.24	6.214	0.838642	-0.253873	0.7666	1
Gorasp2	194.345	68.562	177.52	57.338	0.838648	-0.253863	0.7327	1
AI428936	89.005	31.4	81.033	26.173	0.838673	-0.25382	0.8439	1
Tmem125	22.897	8.078	20.478	6.614	0.838731	-0.25372	1	1
Rab27b	25.707	9.069	23.054	7.446	0.838812	-0.25358	0.7782	1
Gm4832	3.233	1.141	2.464	0.796	0.83886	-0.253497	1	1
4933431E20Rik	9.04	3.189	7.783	2.514	0.838864	-0.253492	1	1
Klk1b22	0.543	0.192	0	0	0.838926	-0.253384	1	1
Slmo2	38.937	13.736	35.186	11.365	0.839102	-0.253083	0.8055	1
Mrps16	36.715	12.953	33.154	10.708	0.839103	-0.253081	1	1
Dpm2	40.225	14.191	36.376	11.749	0.839247	-0.252833	1	1
Inpp5j	13.843	4.884	12.201	3.941	0.839735	-0.251994	1	1
Tmc3	0.869	0.307	0.302	0.098	0.840092	-0.251381	1	1
AK084809	1.639	0.578	1.01	0.326	0.840304	-0.251016	1	1
Ost4	71.696	25.293	65.31	21.095	0.840338	-0.250959	0.8364	1
DQ691398	1	0.353	0.424	0.137	0.840355	-0.25093	1	1
Lin37	19.155	6.758	17.09	5.52	0.840423	-0.250813	1	1
Tpmt	4.543	1.603	3.679	1.188	0.840569	-0.250563	1	1
Pdlim1	63.72	22.479	58.011	18.737	0.840624	-0.250468	0.8336	1
Bzw2	68.569	24.19	62.472	20.178	0.84073	-0.250285	0.8344	1
Mrpl53	21.064	7.431	18.854	6.09	0.840944	-0.249918	1	1
Emilin1	3.762	1.327	2.963	0.957	0.840997	-0.249827	1	1
Mir1904	0.537	0.189	0	0	0.841043	-0.249749	1	1
MRPS11	22.517	7.944	20.195	6.523	0.841123	-0.249612	1	1
Nudt5	28.628	10.1	25.815	8.338	0.841261	-0.249374	0.7877	1
Dkc1	27.203	9.597	24.505	7.915	0.841276	-0.249349	0.7877	1
Pla2g12a	29.393	10.369	26.518	8.565	0.841323	-0.249268	1	1
Enpp3	0.885	0.312	0.323	0.104	0.841463	-0.249028	1	1
Hirip3	37.471	13.219	33.957	10.968	0.841691	-0.248638	1	1
Ccnb2	36.15	12.753	32.748	10.577	0.84178	-0.248485	1	1
Akr1c13	31.581	11.141	28.552	9.222	0.841941	-0.24821	0.7957	1
AK013593	8.647	3.051	7.467	2.412	0.842261	-0.24766	1	1
Mrps11	22.589	7.969	20.299	6.556	0.842457	-0.247324	1	1
Solt	4.92	1.736	4.041	1.305	0.842471	-0.247301	1	1
Antxr1	2.765	0.975	2.057	0.664	0.842532	-0.247197	1	1
1810022K09Rik	7.68	2.709	6.579	2.125	0.842545	-0.247174	1	1
Abhd14b	28.984	10.225	26.189	8.459	0.842673	-0.246956	0.7877	1
BC030870	1.622	0.572	1.009	0.326	0.843511	-0.24552	1	1
Myl4	0.991	0.35	0.43	0.139	0.843704	-0.245192	1	1
Sarm1	0.831	0.293	0.283	0.091	0.843774	-0.245071	1	1
DQ686689	0.523	0.185	0	0	0.843882	-0.244887	1	1
Plekhb1	26.34	9.292	23.796	7.686	0.843956	-0.24476	1	1
Mrpl17	49.676	17.525	45.316	14.637	0.844103	-0.24451	0.8223	1
Sdhd	124.644	43.973	114.438	36.963	0.844129	-0.244465	0.8544	1
Stra6	1.683	0.594	1.072	0.346	0.844417	-0.243973	1	1
Aqp4	0.737	0.26	0.199	0.064	0.844444	-0.243926	1	1
Mtif3	14.062	4.961	12.492	4.035	0.844657	-0.243563	1	1
AK008857	3.628	1.28	2.867	0.926	0.844737	-0.243426	1	1
Cp	49.15	17.339	44.867	14.492	0.844757	-0.243392	0.8187	1
Bop1	70.235	24.778	64.328	20.777	0.84479	-0.243335	0.8364	1
Mgat4a	66.962	23.623	61.309	19.802	0.84482	-0.243284	0.8344	1
Pdgfrb	1.168	0.412	0.596	0.193	0.844901	-0.243146	1	1
Mopt	5.017	1.77	4.151	1.341	0.845126	-0.242761	1	1
Dut	17.181	6.061	15.381	4.968	0.845206	-0.242625	1	1
Mif	65.754	23.197	60.229	19.453	0.84527	-0.242516	0.8322	1
ST6GalNAc_VI	2.742	0.967	2.054	0.663	0.84545	-0.242209	1	1
Yif1b	47.033	16.593	42.962	13.876	0.845564	-0.242015	0.8187	1
Prss1	205.499	72.497	189.321	61.149	0.845599	-0.241954	0.7365	1
Akt2	33.93	11.97	30.862	9.968	0.845644	-0.241878	0.8025	1
P2rx3	0.642	0.226	0.114	0.037	0.84584	-0.241543	1	1
G530011O06Rik	1.455	0.513	0.867	0.28	0.846001	-0.241268	1	1
DQ554303	0.515	0.182	0	0	0.846024	-0.24123	1	1
Taf9b	6.89	2.431	5.891	1.903	0.846109	-0.241085	1	1
AK131825	0.669	0.236	0.142	0.046	0.846278	-0.240796	1	1
Ly6e	891.631	314.555	823.751	266.065	0.846334	-0.240701	0.7613	1
Dusp12	11.964	4.221	10.584	3.419	0.84639	-0.240606	1	1
Pclo	5.68	2.004	4.776	1.543	0.846538	-0.240353	1	1
AK042041	0.731	0.258	0.202	0.065	0.846582	-0.240278	1	1
A930038C07Rik	1.194	0.421	0.63	0.203	0.846587	-0.24027	1	1
1700113I22Rik	19.862	7.007	17.902	5.782	0.847009	-0.239551	1	1
mKIAA0340	0.948	0.334	0.402	0.13	0.847076	-0.239436	1	1
AK204365	41.818	14.753	38.222	12.345	0.84714	-0.239327	0.8104	1
4930503E24Rik	39.947	14.093	36.497	11.788	0.84728	-0.239089	1	1
Atp13a4	0.988	0.349	0.442	0.143	0.847294	-0.239065	1	1
Ire1	1.417	0.5	0.839	0.271	0.847333	-0.238998	1	1
Map2k2	72.677	25.639	66.807	21.578	0.847554	-0.238622	0.8383	1
Arcn1	95.651	33.744	88.087	28.451	0.847657	-0.238447	0.7036	1
Ern2	1.415	0.499	0.838	0.271	0.847899	-0.238036	1	1
Prim1	40.016	14.117	36.589	11.818	0.84792	-0.238001	1	1
Tle6	71.826	25.339	66.061	21.337	0.848058	-0.237765	0.8364	1
Rassf3	44.408	15.667	40.677	13.138	0.848263	-0.237416	0.8148	1
1110032A03Rik	5.705	2.013	4.819	1.556	0.848324	-0.237313	1	1
DQ556157	169.625	59.841	156.703	50.614	0.848342	-0.237281	0.8617	1
1110002N22Rik	8.757	3.089	7.644	2.469	0.848374	-0.237228	1	1
Efs	1.185	0.418	0.63	0.203	0.848378	-0.237221	1	1
Acaa1a	57.666	20.344	52.985	17.114	0.848669	-0.236725	0.8284	1
AK044300	1.989	0.702	1.379	0.445	0.849001	-0.236162	1	1
Mrpl34	52.076	18.372	47.824	15.447	0.849009	-0.236148	0.8223	1
Phyh	36.406	12.844	33.305	10.757	0.849249	-0.235741	1	1
3000002C10Rik	1.097	0.387	0.55	0.178	0.849315	-0.235628	1	1
Pstpip2	0.892	0.315	0.363	0.117	0.84943	-0.235434	1	1
Josd2	40.512	14.292	37.123	11.99	0.849464	-0.235376	1	1
Cxcr7	6.665	2.351	5.718	1.847	0.849597	-0.235149	1	1
Jmjd8	96.935	34.197	89.52	28.914	0.849902	-0.234632	0.8476	1
AW209491	12.873	4.541	11.491	3.711	0.850208	-0.234113	1	1
Il11ra1	14.141	4.989	12.676	4.094	0.850559	-0.233516	1	1
Ucp2	151.579	53.475	140.373	45.339	0.850647	-0.233367	0.859	1
Slc25a42	2.735	0.965	2.08	0.672	0.850891	-0.232954	1	1
Myadml2	0.52	0.183	0.022	0.007	0.851226	-0.232386	1	1
Zfp658	1.475	0.52	0.911	0.294	0.851316	-0.232234	1	1
Mrpl10	39.379	13.892	36.161	11.68	0.851464	-0.231983	1	1
AK019237	25.22	8.897	22.994	7.427	0.85147	-0.231972	0.7782	1
Tor2a	64.117	22.62	59.172	19.112	0.851482	-0.231952	0.8322	1
mKIAA4044	8.269	2.917	7.237	2.337	0.851927	-0.231197	1	1
BC094334	1.636	0.577	1.066	0.344	0.852251	-0.23065	1	1
Mrps10	9.755	3.441	8.623	2.785	0.852286	-0.230591	1	1
AK018490	1.025	0.362	0.5	0.161	0.852423	-0.230359	1	1
Rg9mtd3	10.345	3.65	9.178	2.964	0.852473	-0.230274	1	1
Cmas	43.476	15.338	40.029	12.929	0.852552	-0.23014	1	1
INPP5P	16.044	5.66	14.482	4.678	0.852553	-0.230139	1	1
Ak2	123.951	43.728	115.036	37.156	0.853067	-0.229268	0.8544	1
Vps36	55.474	19.57	51.236	16.549	0.853136	-0.229153	0.8284	1
Rsu1	24.288	8.568	22.177	7.163	0.853156	-0.229118	0.7782	1
Mpp2	12.639	4.459	11.331	3.66	0.853636	-0.228307	1	1
Ttc23	16.946	5.978	15.357	4.96	0.854113	-0.227501	1	1
Hspa5	2288.97	807.514	2134.99	689.583	0.854139	-0.227458	0.7669	1
4833439L19Rik	44.423	15.672	40.995	13.241	0.854187	-0.227377	0.8148	1
Tbl2	18.399	6.491	16.717	5.399	0.854225	-0.227312	1	1
Gyg	54.742	19.312	50.628	16.352	0.854273	-0.22723	0.8255	1
Krcc1	40.915	14.434	37.727	12.186	0.854348	-0.227105	1	1
Eny2	30.819	10.872	28.308	9.143	0.854363	-0.227079	0.7957	1
Vsig2	37.813	13.34	34.843	11.254	0.854533	-0.226792	1	1
Rap1a	18.762	6.619	17.073	5.514	0.854968	-0.226058	1	1
Angpt1	2.952	1.041	2.308	0.745	0.854973	-0.226049	1	1
Prc1	20.949	7.391	19.12	6.176	0.855202	-0.225663	1	1
Z12226	0.768	0.271	0.268	0.087	0.855232	-0.225612	1	1
St6galnac6	2.476	0.873	1.863	0.602	0.855312	-0.225477	1	1
Fam161a	0.97	0.342	0.458	0.148	0.85544	-0.225262	1	1
Gnas	246.439	86.94	229.851	74.24	0.855583	-0.22502	0.7421	1
Vwa3b	0.739	0.261	0.246	0.079	0.85567	-0.224873	1	1
Glrx5	45.799	16.157	42.358	13.681	0.855686	-0.224847	1	1
Gm11744	1.685	0.594	1.126	0.364	0.855709	-0.224808	1	1
AK171183	1.608	0.567	1.056	0.341	0.855775	-0.224696	1	1
Rhbdd3	15.354	5.417	13.906	4.492	0.855852	-0.224567	1	1
Mfsd2a	3.951	1.394	3.249	1.049	0.85589	-0.224503	1	1
Loh12cr1	9.917	3.499	8.826	2.851	0.855968	-0.224371	1	1
Pdcd4	136.083	48.008	126.801	40.956	0.856105	-0.22414	0.8569	1
1110004E09Rik	32.299	11.395	29.759	9.612	0.856152	-0.224062	1	1
BC021614	3.594	1.268	2.916	0.942	0.856261	-0.223877	1	1
Entpd7	11.406	4.024	10.225	3.303	0.856489	-0.223494	1	1
Gm4013	1.916	0.676	1.351	0.436	0.856802	-0.222966	1	1
AK087351	0.472	0.167	0	0	0.856898	-0.222805	1	1
Rbm24	0.512	0.181	0.038	0.012	0.856901	-0.2228	1	1
Ccdc17	2.089	0.737	1.515	0.489	0.857225	-0.222254	1	1
Fksg24	18.873	6.658	17.23	5.565	0.857273	-0.222173	1	1
Hist1h2ak	0.743	0.262	0.254	0.082	0.857369	-0.222011	1	1
Ufsp1	2.693	0.95	2.082	0.672	0.857436	-0.221899	1	1
Tln2	6.783	2.393	5.912	1.91	0.857648	-0.221542	1	1
6720463M24Rik	8.622	3.042	7.639	2.467	0.857744	-0.221381	1	1
Khdc1a	0.604	0.213	0.128	0.041	0.858203	-0.220609	1	1
Gtpbp5	14.527	5.125	13.183	4.258	0.858449	-0.220196	1	1
Pigf	41.57	14.665	38.545	12.45	0.858602	-0.219939	0.8104	1
Magix	0.782	0.276	0.296	0.096	0.858934	-0.219381	1	1
Rhd	0.905	0.319	0.411	0.133	0.858984	-0.219297	1	1
Dlgap1	1.105	0.39	0.602	0.194	0.858993	-0.219282	1	1
AI462493	25.539	9.01	23.527	7.599	0.859041	-0.219201	1	1
Pde4a	7.596	2.68	6.694	2.162	0.859239	-0.218868	1	1
Dnajc28	1.275	0.45	0.761	0.246	0.85931	-0.218749	1	1
AK005951	0.514	0.181	0.045	0.015	0.859441	-0.218529	1	1
Gpr30	1.333	0.47	0.817	0.264	0.859864	-0.21782	1	1
Rpl39	121.033	42.699	113.241	36.576	0.859882	-0.217789	0.8545	1
Dars2	9.039	3.189	8.06	2.603	0.86011	-0.217407	1	1
2610024G14Rik	18.061	6.372	16.537	5.341	0.860147	-0.217346	1	1
Chrm1	0.793	0.28	0.313	0.101	0.860156	-0.217329	1	1
Mdh1	157.031	55.398	147.111	47.516	0.860243	-0.217183	0.8607	1
St7	15.285	5.392	13.933	4.5	0.860451	-0.216836	1	1
Vav1	1.495	0.527	0.971	0.314	0.860511	-0.216735	1	1
Dhrs7	18.862	6.654	17.297	5.587	0.860596	-0.216592	1	1
Foxa2	43.14	15.219	40.123	12.959	0.860657	-0.216489	1	1
Slc29a1	25.214	8.895	23.275	7.518	0.860839	-0.216185	1	1
2410022L05Rik	8.692	3.066	7.742	2.501	0.861043	-0.215843	1	1
Qrsl1	7.363	2.598	6.498	2.099	0.861312	-0.215392	1	1
mKIAA0044	4.781	1.687	4.072	1.315	0.861556	-0.214984	1	1
Mthfd1	71.519	25.231	66.879	21.601	0.861614	-0.214886	1	1
Rai2	2.146	0.757	1.592	0.514	0.861696	-0.214749	1	1
Polr2k	3.849	1.358	3.196	1.032	0.861747	-0.214663	1	1
Lypd6	0.636	0.224	0.17	0.055	0.861928	-0.214361	1	1
Lrrc14b	3.02	1.065	2.416	0.78	0.861985	-0.214265	1	1
Tpx2	22.249	7.849	20.52	6.628	0.862018	-0.21421	1	1
[truncated: 27,865 more rows]
